# Supplementary material for: Mechanical Characterization of Anhydrous Microporous Aluminophosphate Materials: Tridimensional Incompressibility, Ductility, Isotropy and Negative Linear Compressibility
Source: MDPI journal article supplement (doi:10.3390/solids3030032), 2022-08-16
Supplement: s1 [file s1]

# SUPPLEMENTARY MATERIAL

## Mechanical Characterization of Anhydrous Microporous Aluminophosphate Materials: Tridimensional Incompressibility, Ductility, Isotropy and Negative Linear Compressibility

Francisco Colmenero <sup>1,2,\*</sup>, Álvaro Lobato <sup>1</sup> and Vicente Timón <sup>2</sup>

<sup>1</sup> Department of Chemical-Physics, Facultad de Ciencias Químicas, Universidad Complutense de Madrid, 28040 Madrid, Spain

<sup>2</sup> Instituto de Estructura de la Materia, Consejo Superior de Investigaciones Científicas, 28006 Madrid, Spain

| Contents:                                                                                           | Page |
|-----------------------------------------------------------------------------------------------------|------|
| Table S.1. Material data and calculation parameters                                                 | S.3  |
| Table S.2. Most intense reflections in the X-ray diffraction pattern of VPI-5 ( $P6_3cm$ )          | S.4  |
| Table S.3. Most intense reflections in the X-ray diffraction pattern of ALPO-8 ( $Cmc2_1$ )         | S.5  |
| Table S.4. Most intense reflections in the X-ray diffraction pattern of ALPO-5 ( $P6cc$ )           | S.6  |
| Table S.5. Most intense reflections in the X-ray diffraction pattern of ALPO-18 ( $C2/c$ )          | S.7  |
| Table S.6. Most intense reflections in the X-ray diffraction pattern of ALPO-31 ( $\bar{R}3$ )      | S.8  |
| Table S.7. Interatomic distances in VPI-5 ( $P6_3cm$ )                                              | S.9  |
| Table S.8. Interatomic distances in ALPO-8 ( $Cmc2_1$ )                                             | S.10 |
| Table S.9. Interatomic distances in ALPO-5 ( $P6cc$ )                                               | S.11 |
| Table S.10. Interatomic distances in ALPO-18 ( $C2/c$ )                                             | S.12 |
| Table S.11. Interatomic distances in ALPO-31 ( $\bar{R}3$ )                                         | S.13 |
| Table S.12. Unit cell parameters of VPI-5 ( $P6_3cm$ ) under external isotropic pressures           | S.14 |
| Table S.13. Computed compressibilities of VPI-5 ( $P6_3cm$ ) under external isotropic pressures     | S.15 |
| Table S.14. Unit cell parameters of ALPO-8 ( $Cmc2_1$ ) under external isotropic pressures          | S.16 |
| Table S.15. Computed compressibilities of ALPO-8 ( $Cmc2_1$ ) under external isotropic pressures    | S.17 |
| Table S.16. Unit cell parameters of ALPO-5 ( $P6cc$ ) under external isotropic pressures            | S.18 |
| Table S.17. Computed compressibilities of ALPO-5 ( $P6cc$ ) under external isotropic pressures      | S.19 |
| Table S.18. Unit cell parameters of ALPO-31 ( $\bar{R}3$ ) under external isotropic pressures       | S.20 |
| Table S.19. Computed compressibilities of ALPO-31 ( $\bar{R}3$ ) under external isotropic pressures | S.21 |
| Table S.20. Unit cell parameters of ALPO-18 ( $C2/c$ ) under external isotropic pressures           | S.22 |
| Table S.21. Computed compressibilities of ALPO-18 ( $C2/c$ ) under external isotropic pressures     | S.23 |
| Table S.22. Unit cell parameters of ALPO-18 under external anisotropic pressures                    | S.24 |

|                                                                                                        |      |
|--------------------------------------------------------------------------------------------------------|------|
| Table S.23. Computed compressibilities of ALPO-18 under external anisotropic pressures                 | S.25 |
| Figure S.1. View of the crystal structure of VPI-5 ( $P6_3cm$ ) under different isotropic pressures    | S.26 |
| Figure S.2. The 8-MR channels in ALPO18 expanding along $[1\ 0\ 0]$ and $[1\ 1\ 0]$ under pressure     | S.27 |
| Figure S.3. Orientational dependence of the Mechanical properties of ALPO-18W ( $P1$ )                 | S.28 |
| Figure S.4. Unit cell parameters and compressibilities of ALPO-18W ( $P1$ ) as a function of pressure  | S.29 |
| Table S.24. Unit cell parameters of ALPO-18W ( $P1$ ) under external isotropic pressures               | S.30 |
| Table S.25. Computed compressibilities of ALPO-18W ( $P1$ ) under external isotropic pressures         | S.31 |
| Table S.26. Lattice parameters of VPI-5 ( $C1m1$ ) and ALPO-5 ( $Pcc2$ )                               | S.32 |
| Figure S.5. Orientational dependence of the Mechanical properties of VPI-5 ( $C1m1$ )                  | S.33 |
| Figure S.6. Unit cell parameters and compressibilities of VPI-5 ( $C1m1$ ) as a function of pressure   | S.34 |
| Table S.27. Unit cell parameters of VPI-5 ( $C1m1$ ) under external isotropic pressures                | S.35 |
| Table S.28. Computed compressibilities of VPI-5 ( $C1m1$ ) under external isotropic pressures          | S.36 |
| Figure S.7. Comparison of the X-ray diffraction patterns of VPI-5 ( $P6_3cm$ and $C1m1$ )              | S.37 |
| Table S.29. Most intense reflections in the X-ray diffraction pattern of VPI-5 ( $C1m1$ )              | S.38 |
| Table S.30. X-ray diffraction patterns of VPI-5 derived from two experimental structures               | S.39 |
| Figure S.8. Comparison of the X-ray diffraction patterns of ALPO-5 ( $P6cc$ and $Pcc2$ )               | S.40 |
| Figure S.9. Orientational dependence of the Mechanical properties of ALPO-18W ( $P1$ )                 | S.41 |
| Figure S.10. Unit cell parameters and compressibilities of ALPO-18W ( $P1$ ) as a function of pressure | S.42 |
| Table S.31. Most intense reflections in the X-ray diffraction pattern of ALPO-5 ( $Pcc2$ )             | S.43 |
| Table S.32. Unit cell parameters of ALPO-5 ( $Pcc2$ ) under external isotropic pressures               | S.44 |
| Table S.33. Computed compressibilities of ALPO-5 ( $Pcc2$ ) under external isotropic pressures         | S.45 |
| References                                                                                             | S.46 |

**Table S.1.** Material data and calculation parameters.

| Compound     | Framework topology | Structural formula                     | Crystal system | Space group          | $\epsilon$ (eV) | $k$ -mesh             |
|--------------|--------------------|----------------------------------------|----------------|----------------------|-----------------|-----------------------|
| VPI-5 [1-2]  | VFI                | AlPO <sub>4</sub>                      | Hexagonal      | $P6_3cm$ (no. 185)   | 1000            | $2 \times 2 \times 4$ |
|              |                    |                                        | Monoclinic     | $C1m1$ (no. 8)       | 1000            | $1 \times 1 \times 3$ |
| ALPO-8 [3]   | AET                | AlPO <sub>4</sub>                      | Orthorhombic   | $Cmc2_1$ (no. 36)    | 1000            | $1 \times 2 \times 3$ |
| ALPO-5 [4-5] | AFI                | AlPO <sub>4</sub>                      | Orthorhombic   | $Pcc2$ (no. 27)      | 1000            | $2 \times 1 \times 3$ |
|              |                    |                                        | Hexagonal      | $P6cc$ (no. 184)     | 1000            | $2 \times 2 \times 4$ |
| ALPO-18 [6]  | AEI                | AlPO <sub>4</sub>                      | Monoclinic     | $C2/c$ (no. 15)      | 1000            | $2 \times 2 \times 1$ |
| ALPO-18W [7] | AEI                | AlPO <sub>4</sub> · 2 H <sub>2</sub> O | Triclinic      | $P1$ (no. 1)         | 1000            | $3 \times 3 \times 1$ |
| ALPO-31 [8]  | ATO                | AlPO <sub>4</sub>                      | Trigonal       | $\bar{R}3$ (no. 148) | 1000            | $1 \times 1 \times 6$ |

**Table S.2.** Most intense reflections in the X-ray diffraction pattern of VPI-5 ( $P6_3cm$ ): (a) X-ray pattern derived from the experimental crystal structure [1]; (b) X-ray pattern derived from the calculated crystal structure.

| $[h\ k\ l]$ | (a) Exp [1].            |                   |           | (b) Calc.               |                   | $\Delta\ (2\theta)$ |
|-------------|-------------------------|-------------------|-----------|-------------------------|-------------------|---------------------|
|             | $2\theta\ (\text{deg})$ | $d\ (\text{\AA})$ | $I\ (\%)$ | $2\theta\ (\text{deg})$ | $d\ (\text{\AA})$ |                     |
| [0 1 0]     | 5.482                   | 16.109            | 100.000   | 5.499                   | 16.059            | 0.02                |
| [0 2 0]     | 10.976                  | 8.054             | 9.126     | 11.010                  | 8.029             | 0.03                |
| [0 0 2]     | 21.222                  | 4.183             | 6.082     | 20.786                  | 4.270             | -0.44               |
| [-2 4 1]    | 21.849                  | 4.065             | 4.054     | 21.797                  | 4.074             | -0.05               |
| [-1 4 1]    | 22.543                  | 3.941             | 3.765     | 22.496                  | 3.949             | -0.05               |
| [-2 4 0]    | 19.070                  | 4.650             | 3.207     | 19.130                  | 4.636             | 0.06                |
| [0 1 2]     | 21.935                  | 4.049             | 2.784     | 21.517                  | 4.127             | -0.42               |
| [-2 5 0]    | 24.062                  | 3.696             | 2.569     | 24.138                  | 3.684             | 0.08                |
| [-1 6 0]    | 30.882                  | 2.893             | 1.484     | 30.980                  | 2.884             | 0.10                |
| [-3 6 0]    | 28.775                  | 3.100             | 1.426     | 28.866                  | 3.091             | 0.09                |
| [-1 5 1]    | 27.501                  | 3.241             | 1.195     | 27.490                  | 3.242             | -0.01               |
| [-2 7 0]    | 34.751                  | 2.579             | 1.093     | 34.862                  | 2.572             | 0.11                |

**Table S.3.** Most intense reflections in the X-ray diffraction pattern of ALPO-8 (*Cmc2<sub>1</sub>*): (a) X-ray pattern derived from the experimental crystal structure [3]; (b) X-ray pattern derived from the calculated crystal structure.

| $[h\ k\ l]$ | (a) Exp. [3]            |                   |           | (b) Calc.               |                   | $\Delta\ (2\theta)$ |
|-------------|-------------------------|-------------------|-----------|-------------------------|-------------------|---------------------|
|             | $2\theta\ (\text{deg})$ | $d\ (\text{\AA})$ | $I\ (\%)$ | $2\theta\ (\text{deg})$ | $d\ (\text{\AA})$ |                     |
| [1 1 0]     | 6.545                   | 13.493            | 100.000   | 6.552                   | 13.479            | 0.01                |
| [2 0 0]     | 5.305                   | 16.645            | 78.476    | 5.269                   | 16.759            | -0.04               |
| [0 0 2]     | 21.507                  | 4.129             | 21.719    | 20.786                  | 4.270             | -0.72               |
| [3 1 0]     | 9.964                   | 8.870             | 13.583    | 9.930                   | 8.900             | -0.03               |
| [4 2 0]     | 16.038                  | 5.522             | 8.517     | 16.013                  | 5.530             | -0.02               |
| [6 2 1]     | 22.742                  | 3.907             | 7.237     | 22.512                  | 3.946             | -0.23               |
| [3 3 1]     | 22.492                  | 3.950             | 6.939     | 22.340                  | 3.976             | -0.15               |
| [7 1 1]     | 22.380                  | 3.969             | 5.820     | 22.106                  | 4.018             | -0.27               |
| [9 1 0]     | 24.795                  | 3.588             | 4.584     | 24.638                  | 3.610             | -0.16               |
| [6 2 0]     | 20.005                  | 4.435             | 4.449     | 19.937                  | 4.450             | -0.07               |
| [0 4 0]     | 24.099                  | 3.690             | 4.031     | 24.161                  | 3.681             | 0.06                |
| [1 3 1]     | 21.172                  | 4.193             | 3.846     | 21.030                  | 4.221             | -0.14               |
| [10 2 0]    | 29.410                  | 3.035             | 3.784     | 29.254                  | 3.050             | -0.16               |
| [4 4 0]     | 26.400                  | 3.373             | 2.926     | 26.428                  | 3.370             | 0.03                |
| [6 2 3]     | 38.463                  | 2.339             | 2.732     | 37.475                  | 2.398             | -0.99               |
| [7 1 0]     | 19.596                  | 4.527             | 2.648     | 19.479                  | 4.553             | -0.12               |
| [2 0 2]     | 22.166                  | 4.007             | 2.570     | 21.458                  | 4.138             | -0.71               |
| [1 1 2]     | 22.503                  | 3.948             | 2.503     | 21.817                  | 4.071             | -0.69               |
| [1 3 0]     | 18.212                  | 4.867             | 2.253     | 18.256                  | 4.856             | 0.04                |
| [5 1 0]     | 14.583                  | 6.069             | 2.101     | 14.507                  | 6.101             | -0.08               |
| [0 4 1]     | 26.435                  | 3.369             | 2.070     | 26.347                  | 3.380             | -0.09               |

**Table S.4.** Most intense reflections in the X-ray diffraction pattern of ALPO-5 (*P6cc*): (a) X-ray pattern derived from the experimental crystal structure [5]; (b) X-ray pattern derived from the calculated crystal structure.

| $[h\ k\ l]$ | (a) Exp. [5]            |                   |           | (b) Calc.               |                   | $\Delta\ (2\theta)$ |
|-------------|-------------------------|-------------------|-----------|-------------------------|-------------------|---------------------|
|             | $2\theta\ (\text{deg})$ | $d\ (\text{\AA})$ | $I\ (\%)$ | $2\theta\ (\text{deg})$ | $d\ (\text{\AA})$ |                     |
| [0 1 0]     | 7.435                   | 11.880            | 100.000   | 7.357                   | 12.007            | -0.08               |
| [-1 3 1]    | 22.402                  | 3.966             | 25.962    | 22.165                  | 4.007             | -0.24               |
| [0 0 2]     | 21.003                  | 4.226             | 20.972    | 20.790                  | 4.269             | -0.21               |
| [-1 3 0]    | 19.756                  | 4.490             | 15.619    | 19.545                  | 4.538             | -0.21               |
| [-1 2 0]    | 12.896                  | 6.859             | 10.255    | 12.760                  | 6.932             | -0.14               |
| [-2 4 0]    | 25.960                  | 3.430             | 8.765     | 25.681                  | 3.466             | -0.28               |
| [-1 5 0]    | 34.571                  | 2.593             | 5.960     | 34.194                  | 2.620             | -0.38               |
| [0 4 0]     | 30.064                  | 2.970             | 5.470     | 29.739                  | 3.002             | -0.32               |
| [-1 3 3]    | 37.660                  | 2.387             | 5.151     | 37.262                  | 2.411             | -0.40               |
| [0 1 2]     | 22.309                  | 3.982             | 5.150     | 22.081                  | 4.022             | -0.23               |
| [-1 3 5]    | 58.272                  | 1.582             | 3.917     | 57.628                  | 1.598             | -0.64               |
| [-1 3 2]    | 28.990                  | 3.078             | 3.001     | 28.686                  | 3.110             | -0.30               |
| [0 2 0]     | 14.902                  | 5.940             | 2.707     | 14.744                  | 6.004             | -0.16               |
| [-1 4 1]    | 29.063                  | 3.070             | 2.311     | 28.752                  | 3.103             | -0.31               |

**Table S.5.** Most intense reflections in the X-ray diffraction pattern of ALPO-18 (*C2/c*): (a) X-ray pattern derived from the experimental crystal structure [6]; (b) X-ray pattern derived from the calculated crystal structure.

| $[h\ k\ l]$ | (a) Exp. [6]            |                   |           | (b) Calc.               |                   | $\Delta\ (2\theta)$ |
|-------------|-------------------------|-------------------|-----------|-------------------------|-------------------|---------------------|
|             | $2\theta\ (\text{deg})$ | $d\ (\text{\AA})$ | $I\ (\%)$ | $2\theta\ (\text{deg})$ | $d\ (\text{\AA})$ |                     |
| [1 1 0]     | 9.472                   | 9.330             | 100.000   | 9.539                   | 9.264             | 0.07                |
| [0 0 2]     | 9.517                   | 9.285             | 57.941    | 9.575                   | 9.230             | 0.06                |
| [0 2 2]     | 16.873                  | 5.250             | 19.281    | 16.961                  | 5.223             | 0.09                |
| [-1 -1 1]   | 10.603                  | 8.337             | 14.788    | 10.676                  | 8.280             | 0.07                |
| [2 0 0]     | 12.903                  | 6.856             | 13.341    | 13.029                  | 6.789             | 0.13                |
| [1 1 1]     | 10.604                  | 8.336             | 13.173    | 10.677                  | 8.279             | 0.07                |
| [3 1 0]     | 20.631                  | 4.302             | 12.080    | 20.823                  | 4.263             | 0.19                |
| [-1 1 3]    | 17.176                  | 5.158             | 9.610     | 17.286                  | 5.126             | 0.11                |
| [1 1 3]     | 17.178                  | 5.158             | 9.496     | 17.288                  | 5.125             | 0.11                |
| [0 2 3]     | 19.991                  | 4.438             | 6.690     | 20.101                  | 4.414             | 0.11                |
| [2 0 2]     | 16.059                  | 5.515             | 6.286     | 16.195                  | 5.469             | 0.14                |
| [0 2 5]     | 27.787                  | 3.208             | 6.157     | 27.949                  | 3.190             | 0.16                |
| [-2 0 2]    | 16.056                  | 5.516             | 6.150     | 16.193                  | 5.469             | 0.14                |
| [-2 -2 2]   | 21.298                  | 4.169             | 5.628     | 21.446                  | 4.140             | 0.15                |
| [4 2 2]     | 31.136                  | 2.870             | 5.122     | 31.404                  | 2.846             | 0.27                |
| [-2 2 3]    | 23.865                  | 3.726             | 4.682     | 24.027                  | 3.701             | 0.16                |
| [2 2 3]     | 23.867                  | 3.725             | 4.671     | 24.030                  | 3.700             | 0.16                |
| [0 2 6]     | 32.131                  | 2.784             | 4.380     | 32.322                  | 2.768             | 0.19                |
| [1 1 4]     | 21.362                  | 4.156             | 4.373     | 21.496                  | 4.131             | 0.13                |
| [-4 -2 2]   | 31.133                  | 2.870             | 4.103     | 31.402                  | 2.847             | 0.27                |
| [4 0 0]     | 25.973                  | 3.428             | 3.944     | 26.231                  | 3.395             | 0.26                |
| [-1 3 2]    | 23.931                  | 3.715             | 3.655     | 24.062                  | 3.696             | 0.13                |
| [1 3 3]     | 26.257                  | 3.391             | 3.325     | 26.403                  | 3.373             | 0.15                |
| [2 2 0]     | 19.009                  | 4.665             | 3.129     | 19.146                  | 4.632             | 0.14                |
| [-1 3 3]    | 26.256                  | 3.392             | 2.909     | 26.402                  | 3.373             | 0.15                |
| [2 4 0]     | 30.951                  | 2.887             | 2.817     | 31.131                  | 2.871             | 0.18                |
| [-3 -1 1]   | 21.183                  | 4.191             | 2.760     | 21.377                  | 4.153             | 0.19                |
| [-1 1 2]    | 13.442                  | 6.582             | 2.721     | 13.531                  | 6.539             | 0.09                |
| [-1 3 5]    | 32.672                  | 2.739             | 2.669     | 32.863                  | 2.723             | 0.19                |
| [1 1 2]     | 13.444                  | 6.581             | 2.389     | 13.532                  | 6.538             | 0.09                |
| [-4 -2 1]   | 29.970                  | 2.979             | 2.387     | 30.234                  | 2.954             | 0.26                |

**Table S.6.** Most intense reflections in the X-ray diffraction pattern of ALPO-31 ( $R\bar{3}1$ ): (a) X-ray pattern derived from the experimental crystal structure [8]; (b) X-ray pattern derived from the calculated crystal structure.

| $[h\ k\ l]$ | (a) Exp. [8]            |                   |           | (b) Calc.               |                   | $\Delta\ (2\theta)$ |
|-------------|-------------------------|-------------------|-----------|-------------------------|-------------------|---------------------|
|             | $2\theta\ (\text{deg})$ | $d\ (\text{\AA})$ | $I\ (\%)$ | $2\theta\ (\text{deg})$ | $d\ (\text{\AA})$ |                     |
| [-1 2 0]    | 8.484                   | 10.414            | 100.000   | 8.429                   | 10.482            | -0.05               |
| [-1 5 0]    | 22.572                  | 3.936             | 32.779    | 22.423                  | 3.962             | -0.15               |
| [0 2 1]     | 20.282                  | 4.375             | 32.490    | 20.023                  | 4.431             | -0.26               |
| [-2 3 1]    | 22.020                  | 4.033             | 20.452    | 21.759                  | 4.081             | -0.26               |
| [2 4 1]     | 31.739                  | 2.817             | 15.750    | 31.445                  | 2.843             | -0.29               |
| [-4 5 0]    | 22.572                  | 3.936             | 15.539    | 22.423                  | 3.962             | -0.15               |
| [-5 3 1]    | 27.959                  | 3.189             | 11.108    | 27.681                  | 3.220             | -0.28               |
| [-2 4 0]    | 17.015                  | 5.207             | 10.333    | 16.904                  | 5.241             | -0.11               |
| [0 3 0]     | 14.722                  | 6.012             | 9.145     | 14.626                  | 6.052             | -0.10               |
| [-4 7 1]    | 35.153                  | 2.551             | 5.812     | 34.841                  | 2.573             | -0.31               |
| [0 6 0]     | 29.695                  | 3.006             | 5.228     | 29.497                  | 3.026             | -0.20               |
| [-3 2 1]    | 22.020                  | 4.033             | 4.664     | 21.759                  | 4.081             | -0.26               |
| [-9 8 1]    | 46.662                  | 1.945             | 4.658     | 46.281                  | 1.960             | -0.38               |
| [0 1 2]     | 36.225                  | 2.478             | 3.567     | 35.687                  | 2.514             | -0.54               |
| [-1 4 1]    | 25.154                  | 3.538             | 3.427     | 24.886                  | 3.575             | -0.27               |
| [-7 14 0]   | 62.369                  | 1.488             | 3.296     | 61.918                  | 1.497             | -0.45               |
| [-3 6 0]    | 25.643                  | 3.471             | 2.934     | 25.473                  | 3.494             | -0.17               |
| [1 9 1]     | 51.637                  | 1.769             | 2.705     | 51.221                  | 1.782             | -0.42               |
| [-1 1 1]    | 18.388                  | 4.821             | 2.456     | 18.130                  | 4.889             | -0.26               |
| [-7 4 1]    | 35.153                  | 2.551             | 2.349     | 34.841                  | 2.573             | -0.31               |
| [-2 2 2]    | 37.273                  | 2.411             | 2.197     | 36.734                  | 2.445             | -0.54               |
| [-1 3 2]    | 38.296                  | 2.348             | 2.184     | 37.757                  | 2.381             | -0.54               |
| [4 8 2]     | 66.310                  | 1.409             | 2.149     | 65.634                  | 1.421             | -0.68               |
| [1 4 3]     | 60.219                  | 1.536             | 2.072     | 59.337                  | 1.556             | -0.88               |
| [-11 6 1]   | 51.637                  | 1.769             | 2.060     | 51.221                  | 1.782             | -0.42               |



**Table S.7.** Interatomic distances for the  $P6_3cm$  structure of VPI-5 (in Å).

| Distance | Exp [1]. | Calc. | Distance | Exp [1]. | Calc. |
|----------|----------|-------|----------|----------|-------|
| P-O      |          |       | Al-O     |          |       |
| P1-O1    | 1.459    | 1.507 | Al1-O1   | 1.666    | 1.692 |
| P1-O2    | 1.500    | 1.508 | Al1-O2   | 1.650    | 1.692 |
| P1-O4    | 1.568    | 1.516 | Al1-O3   | 1.768    | 1.704 |
| P1-O4'   | 1.568    | 1.516 | Al1-O3'  | 1.768    | 1.704 |
| <P1-O>   | 1.524    | 1.512 | <Al1-O>  | 1.713    | 1.698 |
| P2-O7    | 1.541    | 1.505 | Al2-O7   | 1.733    | 1.692 |
| P2-O5    | 1.466    | 1.507 | Al2-O5   | 1.715    | 1.693 |
| P2-O6    | 1.476    | 1.517 | Al2-O6   | 1.722    | 1.704 |
| P2-O3    | 1.546    | 1.522 | Al2-O4   | 1.780    | 1.712 |
| <P2-O>   | 1.507    | 1.513 | <Al2-O>  | 1.738    | 1.700 |
| <P-O>    | 1.52     | 1.51  | <Al-O>   | 1.72     | 1.70  |

**Table S.8.** Interatomic distances in ALPO-8 (in Å).

| Distance   | Exp [3]. | Calc. | Distance    | Exp [3]. | Calc. |
|------------|----------|-------|-------------|----------|-------|
| <b>P-O</b> |          |       | <b>Al-O</b> |          |       |
| P1-O5      | 1.499    | 1.505 | Al1-O3      | 1.703    | 1.691 |
| P1-O6      | 1.506    | 1.507 | Al1-O2      | 1.725    | 1.701 |
| P1-O4      | 1.525    | 1.520 | Al1-O2'     | 1.725    | 1.701 |
| P1-O2      | 1.529    | 1.522 | Al1-O1      | 1.734    | 1.689 |
| <P1-O>     | 1.515    | 1.514 | <Al1-O>     | 1.722    | 1.696 |
| P2-O11     | 1.511    | 1.510 | Al2-O5      | 1.713    | 1.693 |
| P2-O12     | 1.519    | 1.509 | Al2-O7      | 1.726    | 1.693 |
| P2-O10     | 1.521    | 1.515 | Al2-O8      | 1.745    | 1.697 |
| P2-O8      | 1.531    | 1.504 | Al2-O9      | 1.749    | 1.703 |
| <P2-O>     | 1.521    | 1.510 | <Al2-O>     | 1.733    | 1.697 |
| P3-O3      | 1.484    | 1.508 | Al3-O14     | 1.714    | 1.694 |
| P3-O15     | 1.516    | 1.517 | Al3-O11     | 1.730    | 1.700 |
| P3-O15'    | 1.516    | 1.517 | Al3-O18     | 1.744    | 1.701 |
| P3-O1      | 1.529    | 1.505 | Al3-O3      | 1.748    | 1.703 |
| <P3-O>     | 1.511    | 1.512 | <Al3-O>     | 1.734    | 1.700 |
| P4-O7      | 1.504    | 1.506 | Al4-O6      | 1.708    | 1.694 |
| P4-O16     | 1.513    | 1.509 | Al4-O16     | 1.710    | 1.695 |
| P4-O17     | 1.518    | 1.514 | Al4-O4      | 1.726    | 1.708 |
| P4-O18     | 1.534    | 1.516 | Al4-O15     | 1.777    | 1.716 |
| <P4-O>     | 1.517    | 1.511 | <Al4-O>     | 1.730    | 1.703 |
| P5-O14     | 1.506    | 1.507 | Al5-O12     | 1.726    | 1.695 |
| P5-O19     | 1.526    | 1.518 | Al5-O10     | 1.731    | 1.700 |
| P5-O9      | 1.530    | 1.513 | Al5-O19     | 1.732    | 1.698 |
| P5-O13     | 1.538    | 1.515 | Al5-O17     | 1.739    | 1.692 |
| <P5-O>     | 1.525    | 1.513 | <Al5-O>     | 1.732    | 1.696 |
| <P-O>      | 1.52     | 1.51  | <Al-O>      | 1.73     | 1.70  |

**Table S.9.** Interatomic distances for the *P6cc* structure of ALPO-5 (in Å).

| Distance | Exp [5]. | Calc. | Distance | Exp [5]. | Calc. |
|----------|----------|-------|----------|----------|-------|
| P-O      |          |       | Al-O     |          |       |
| P1-O2    | 1.431    | 1.508 | Al1-O4   | 1.672    | 1.693 |
| P1-O3    | 1.480    | 1.514 | Al1-O2   | 1.713    | 1.694 |
| P1-O1    | 1.485    | 1.515 | Al1-O1   | 1.718    | 1.701 |
| P1-O4    | 1.533    | 1.508 | Al1-O3   | 1.732    | 1.701 |
| <P-O>    | 1.48     | 1.51  | <Al-O>   | 1.71     | 1.70  |

**Table S.10.** Interatomic distances in ALPO-18 (in Å).

| Distance   | Exp [6]. | Calc. | Distance    | Exp [6]. | Calc. |
|------------|----------|-------|-------------|----------|-------|
| <b>P-O</b> |          |       | <b>Al-O</b> |          |       |
| P1-O5      | 1.507    | 1.509 | Al1-O5      | 1.712    | 1.696 |
| P1-O12     | 1.510    | 1.516 | Al1-O11     | 1.720    | 1.704 |
| P1-O4      | 1.514    | 1.516 | Al1-O6      | 1.729    | 1.702 |
| P1-O10     | 1.518    | 1.510 | Al1-O9      | 1.745    | 1.696 |
| <P1-O>     | 1.512    | 1.513 | <Al1-O>     | 1.727    | 1.700 |
| P2-8       | 1.505    | 1.511 | Al2-O3      | 1.635    | 1.697 |
| P2-O2      | 1.510    | 1.517 | Al2-O10     | 1.727    | 1.696 |
| P2-O11     | 1.515    | 1.517 | Al2-O7      | 1.764    | 1.702 |
| P2-O3      | 1.583    | 1.510 | Al2-O4      | 1.764    | 1.701 |
| <P2-O>     | 1.528    | 1.514 | <Al2-O>     | 1.723    | 1.699 |
| P3-O1      | 1.496    | 1.511 | Al3-O8      | 1.724    | 1.697 |
| P3-O7      | 1.502    | 1.516 | Al3-O2      | 1.735    | 1.703 |
| P3-O9      | 1.504    | 1.510 | Al3-O12     | 1.736    | 1.703 |
| P3-O6      | 1.517    | 1.516 | Al3-O1      | 1.740    | 1.698 |
| <P3-O>     | 1.505    | 1.513 | <Al3-O>     | 1.734    | 1.700 |
| <P-O>      | 1.51     | 1.51  | <Al-O>      | 1.73     | 1.70  |

**Table S.11.** Interatomic distances in ALPO-31 (in Å).

| Distance | Exp [8]. | Calc. | Distance | Exp [8]. | Calc. |
|----------|----------|-------|----------|----------|-------|
| P-O      |          |       | Al-O     |          |       |
| P-O3     | 1.568    | 1.509 | Al1-O2   | 1.686    | 1.698 |
| P-O1     | 1.580    | 1.513 | Al1-O3   | 1.720    | 1.695 |
| P-O2     | 1.583    | 1.513 | Al1-O1   | 1.738    | 1.700 |
| P-O4     | 1.633    | 1.513 | Al1-O4   | 1.788    | 1.700 |
| <P-O>    | 1.59     | 1.51  | <Al1-O>  | 1.73     | 1.70  |

**Table S.12.** Unit cell volume and lattice parameters of VPI-5 ( $P6_3cm$ ) under the effect of different external isotropic pressures.

| <b>P (GPa)</b> | <b>Vol. (Å<sup>3</sup>)</b> | <b><i>a</i> (Å)</b> | <b><i>b</i> (Å)</b> | <b><i>c</i> (Å)</b> | <b><i>α</i> (deg)</b> | <b><i>β</i> (deg)</b> | <b><i>γ</i>(deg)</b> |
|----------------|-----------------------------|---------------------|---------------------|---------------------|-----------------------|-----------------------|----------------------|
| -0.5000        | 2564.3816                   | 18.6095             | 18.6095             | 8.5503              | 90.00                 | 90.00                 | 120.00               |
| -0.2502        | 2553.5546                   | 18.5760             | 18.5760             | 8.5450              | 90.00                 | 90.00                 | 120.00               |
| -0.0001        | 2542.9197                   | 18.5431             | 18.5431             | 8.5396              | 90.00                 | 90.00                 | 120.00               |
| 0.2500         | 2532.4231                   | 18.5105             | 18.5105             | 8.5343              | 90.00                 | 90.00                 | 120.00               |
| 0.4998         | 2522.0647                   | 18.4781             | 18.4781             | 8.5293              | 90.00                 | 90.00                 | 120.00               |
| 1.0003         | 2501.2104                   | 18.4123             | 18.4123             | 8.5193              | 90.00                 | 90.00                 | 120.00               |
| 2.0011         | 2460.4440                   | 18.2820             | 18.2820             | 8.5003              | 90.00                 | 90.00                 | 120.00               |
| 3.0000         | 2421.2291                   | 18.1635             | 18.1635             | 8.4743              | 90.00                 | 90.00                 | 120.00               |
| 4.0002         | 2374.3623                   | 18.0309             | 18.0309             | 8.4330              | 90.00                 | 90.00                 | 120.00               |
| 5.0000         | 2307.8959                   | 17.8764             | 17.8764             | 8.3392              | 90.00                 | 90.00                 | 120.00               |

**Table S.13.** Calculated volumetric compressibilities ( $k_V = -1/V \cdot (\partial V/\partial P)_P$ ) of VPI-5 ( $P6_3cm$ ) and compressibilities along  $a$ ,  $b$  and  $c$  directions ( $k_m = -1/m \cdot (\partial m/\partial P)_P$ ) for different external isotropic pressures. The computed bulk moduli ( $B$ ) are given in the last column of the table.

| <b>P (GPa)</b> | <b><math>k_V(\text{TPa}^{-1})</math></b> | <b><math>k_a(\text{TPa}^{-1})</math></b> | <b><math>k_b(\text{TPa}^{-1})</math></b> | <b><math>k_c(\text{TPa}^{-1})</math></b> | <b><math>B(\text{GPa})</math></b> |
|----------------|------------------------------------------|------------------------------------------|------------------------------------------|------------------------------------------|-----------------------------------|
| 0.00           | 16.46                                    | 6.95                                     | 6.95                                     | 2.56                                     | 60.74                             |
| 0.50           | 16.55                                    | 7.10                                     | 7.10                                     | 2.35                                     | 60.40                             |
| 1.00           | 16.67                                    | 7.25                                     | 7.25                                     | 2.16                                     | 60.01                             |
| 1.50           | 16.42                                    | 7.10                                     | 7.10                                     | 2.22                                     | 60.91                             |
| 2.00           | 16.00                                    | 6.74                                     | 6.74                                     | 2.53                                     | 62.50                             |
| 2.50           | 15.94                                    | 6.46                                     | 6.46                                     | 3.02                                     | 62.75                             |
| 3.00           | 16.86                                    | 6.58                                     | 6.58                                     | 3.70                                     | 59.32                             |
| 3.50           | 19.26                                    | 7.26                                     | 7.26                                     | 4.75                                     | 51.92                             |
| 4.00           | 23.28                                    | 8.29                                     | 8.29                                     | 6.70                                     | 42.95                             |

**Table S.14.** Unit cell volume and lattice parameters of ALPO-8 under the effect of different external isotropic pressures.

| <b>P (GPa)</b> | <b>Vol. (Å<sup>3</sup>)</b> | <b><i>a</i> (Å)</b> | <b><i>b</i> (Å)</b> | <b><i>c</i> (Å)</b> | <b><i>α</i> (deg)</b> | <b><i>β</i> (deg)</b> | <b><i>γ</i>(deg)</b> |
|----------------|-----------------------------|---------------------|---------------------|---------------------|-----------------------|-----------------------|----------------------|
| -0.4998        | 4243.7090                   | 33.6361             | 14.7582             | 8.5488              | 90.00                 | 90.00                 | 90.00                |
| -0.2502        | 4228.6333                   | 33.5636             | 14.7453             | 8.5443              | 90.00                 | 90.00                 | 90.00                |
| -0.0004        | 4213.9746                   | 33.5175             | 14.7223             | 8.5398              | 90.00                 | 90.00                 | 90.00                |
| 0.2498         | 4197.3731                   | 33.4377             | 14.7072             | 8.5352              | 90.00                 | 90.00                 | 90.00                |
| 0.5002         | 4167.7665                   | 33.3253             | 14.6755             | 8.5219              | 90.00                 | 90.00                 | 90.00                |
| 1.0001         | 4093.3425                   | 33.1506             | 14.5813             | 8.4682              | 90.00                 | 90.00                 | 90.00                |
| 1.9997         | 3911.6747                   | 32.8182             | 14.3298             | 8.3178              | 90.00                 | 90.00                 | 90.00                |
| 3.0005         | 3695.2847                   | 32.6778             | 13.9605             | 8.1001              | 90.00                 | 90.00                 | 90.00                |
| 4.0005         | 3535.8598                   | 32.4206             | 13.7281             | 7.9445              | 90.00                 | 90.00                 | 90.00                |
| 4.9998         | 3400.4830                   | 31.9466             | 13.5530             | 7.8538              | 90.00                 | 90.00                 | 90.00                |



**Table S.15.** Calculated volumetric compressibilities ( $k_V = -1/V \cdot (\partial V/\partial P)_P$ ) of ALPO-8 and compressibilities along  $a$ ,  $b$  and  $c$  directions ( $k_m = -1/m \cdot (\partial m/\partial P)_P$ ) for different external isotropic pressures. The computed bulk moduli ( $B$ ) are given in the last column of the table.

| <b>P (GPa)</b> | <b><math>k_V(\text{TPa}^{-1})</math></b> | <b><math>k_a(\text{TPa}^{-1})</math></b> | <b><math>k_b(\text{TPa}^{-1})</math></b> | <b><math>k_c(\text{TPa}^{-1})</math></b> | <b><math>B(\text{GPa})</math></b> |
|----------------|------------------------------------------|------------------------------------------|------------------------------------------|------------------------------------------|-----------------------------------|
| 0.00           | 13.77                                    | 6.93                                     | 5.04                                     | 1.81                                     | 72.60                             |
| 0.50           | 28.35                                    | 11.26                                    | 9.25                                     | 7.84                                     | 35.27                             |
| 1.00           | 38.01                                    | 12.03                                    | 12.87                                    | 13.11                                    | 26.31                             |
| 1.50           | 47.33                                    | 10.08                                    | 18.23                                    | 19.02                                    | 21.13                             |
| 2.00           | 54.47                                    | 6.64                                     | 23.69                                    | 24.15                                    | 18.36                             |
| 2.50           | 57.12                                    | 3.88                                     | 26.53                                    | 26.71                                    | 17.51                             |
| 3.00           | 53.63                                    | 3.88                                     | 24.43                                    | 25.32                                    | 18.65                             |
| 3.50           | 44.60                                    | 7.49                                     | 17.20                                    | 19.91                                    | 22.42                             |
| 4.00           | 34.76                                    | 13.33                                    | 8.71                                     | 12.72                                    | 28.77                             |

**Table S.16.** Unit cell volume and lattice parameters of ALPO-5 (*P6cc*) under the effect of different external isotropic pressures.

| <b>P (GPa)</b> | <b>Vol. (Å<sup>3</sup>)</b> | <b><i>a</i> (Å)</b> | <b><i>b</i> (Å)</b> | <b><i>c</i> (Å)</b> | <b><i>α</i> (deg)</b> | <b><i>β</i> (deg)</b> | <b><i>γ</i>(deg)</b> |
|----------------|-----------------------------|---------------------|---------------------|---------------------|-----------------------|-----------------------|----------------------|
| -0.4989        | 1429.0148                   | 13.8935             | 13.8935             | 8.5484              | 90.00                 | 90.00                 | 120.00               |
| -0.2500        | 1424.9925                   | 13.8779             | 13.8779             | 8.5435              | 90.00                 | 90.00                 | 120.00               |
| 0.0003         | 1421.3664                   | 13.8645             | 13.8645             | 8.5382              | 90.00                 | 90.00                 | 120.00               |
| 0.2498         | 1417.0366                   | 13.8470             | 13.8470             | 8.5337              | 90.00                 | 90.00                 | 120.00               |
| 0.5000         | 1413.4931                   | 13.8341             | 13.8341             | 8.5283              | 90.00                 | 90.00                 | 120.00               |
| 1.0000         | 1404.6021                   | 13.7983             | 13.7983             | 8.5187              | 90.00                 | 90.00                 | 120.00               |
| 1.9999         | 1384.0784                   | 13.7114             | 13.7114             | 8.5010              | 90.00                 | 90.00                 | 120.00               |
| 3.0000         | 1354.9392                   | 13.5744             | 13.5744             | 8.4908              | 90.00                 | 90.00                 | 120.00               |
| 3.9998         | 1327.3986                   | 13.4447             | 13.4447             | 8.4795              | 90.00                 | 90.00                 | 120.00               |
| 5.0001         | 1301.7433                   | 13.3217             | 13.3217             | 8.4699              | 90.00                 | 90.00                 | 120.00               |

**Table S.17.** Calculated volumetric compressibilities ( $k_V = -1/V \cdot (\partial V/\partial P)_P$ ) of ALPO-5 (*P6cc*) and compressibilities along *a*, *b* and *c* directions ( $k_m = -1/m \cdot (\partial m/\partial P)_P$ ) for different external isotropic pressures. The computed bulk moduli (*B*) are given in the last column of the table.

| <b>P (GPa)</b> | <b><math>k_V(\text{TPa}^{-1})</math></b> | <b><math>k_a(\text{TPa}^{-1})</math></b> | <b><math>k_b(\text{TPa}^{-1})</math></b> | <b><math>k_c(\text{TPa}^{-1})</math></b> | <b><i>B</i>(GPa)</b> |
|----------------|------------------------------------------|------------------------------------------|------------------------------------------|------------------------------------------|----------------------|
| 0.00           | 11.45                                    | 4.61                                     | 4.61                                     | 2.25                                     | 87.27                |
| 0.50           | 11.38                                    | 4.50                                     | 4.50                                     | 2.36                                     | 87.97                |
| 1.00           | 12.26                                    | 4.94                                     | 4.94                                     | 2.36                                     | 81.64                |
| 1.50           | 14.87                                    | 6.40                                     | 6.40                                     | 2.07                                     | 67.21                |
| 2.00           | 18.45                                    | 8.44                                     | 8.44                                     | 1.59                                     | 54.15                |
| 2.50           | 21.48                                    | 10.16                                    | 10.16                                    | 1.17                                     | 46.55                |
| 3.00           | 22.47                                    | 10.70                                    | 10.70                                    | 1.04                                     | 44.55                |
| 3.50           | 20.84                                    | 9.77                                     | 9.77                                     | 1.29                                     | 48.01                |
| 4.00           | 17.86                                    | 8.12                                     | 8.12                                     | 1.67                                     | 55.83                |

**Table S.18.** Unit cell volume and lattice parameters of ALPO-31 under the effect of different external isotropic pressures.

| <b>P (GPa)</b> | <b>Vol. (Å<sup>3</sup>)</b> | <b><i>a</i> (Å)</b> | <b><i>b</i> (Å)</b> | <b><i>c</i> (Å)</b> | <b><i>α</i> (deg)</b> | <b><i>β</i> (deg)</b> | <b><i>γ</i>(deg)</b> |
|----------------|-----------------------------|---------------------|---------------------|---------------------|-----------------------|-----------------------|----------------------|
| -0.5000        | 1944.7329                   | 21.0150             | 21.0150             | 5.0848              | 90.00                 | 90.00                 | 120.00               |
| -0.2504        | 1938.5988                   | 20.9896             | 20.9896             | 5.0810              | 90.00                 | 90.00                 | 120.00               |
| 0.0000         | 1932.1567                   | 20.9635             | 20.9635             | 5.0767              | 90.00                 | 90.00                 | 120.00               |
| 0.2503         | 1926.1653                   | 20.9370             | 20.9370             | 5.0738              | 90.00                 | 90.00                 | 120.00               |
| 0.5000         | 1919.0519                   | 20.9087             | 20.9087             | 5.0687              | 90.00                 | 90.00                 | 120.00               |
| 1.0001         | 1899.6773                   | 20.8402             | 20.8402             | 5.0506              | 90.00                 | 90.00                 | 120.00               |
| 1.4997         | 1857.3030                   | 20.7078             | 20.7078             | 5.0013              | 90.00                 | 90.00                 | 120.00               |
| 2.0001         | 1808.3281                   | 20.5438             | 20.5438             | 4.9475              | 90.00                 | 90.00                 | 120.00               |
| 2.9996         | 1734.9453                   | 20.2762             | 20.2762             | 4.8729              | 90.00                 | 90.00                 | 120.00               |
| 4.0011         | 1671.5079                   | 20.0160             | 20.0160             | 4.8175              | 90.00                 | 90.00                 | 120.00               |
| 5.0004         | 1619.9759                   | 19.7873             | 19.7873             | 4.7775              | 90.00                 | 90.00                 | 120.00               |

**Table S.19.** Calculated volumetric compressibilities ( $k_V = -1/V \cdot (\partial V/\partial P)_P$ ) of ALPO-31 and compressibilities along  $a$ ,  $b$  and  $c$  directions ( $k_m = -1/m \cdot (\partial m/\partial P)_P$ ) for different external isotropic pressures. The computed bulk moduli ( $B$ ) are given in the last column of the table.

| <b>P (GPa)</b> | <b><math>k_V(\text{TPa}^{-1})</math></b> | <b><math>k_a(\text{TPa}^{-1})</math></b> | <b><math>k_b(\text{TPa}^{-1})</math></b> | <b><math>k_c(\text{TPa}^{-1})</math></b> | <b><math>B(\text{GPa})</math></b> |
|----------------|------------------------------------------|------------------------------------------|------------------------------------------|------------------------------------------|-----------------------------------|
| 0.00           | 11.09                                    | 4.43                                     | 4.43                                     | 2.23                                     | 90.14                             |
| 0.50           | 20.58                                    | 6.67                                     | 6.67                                     | 7.24                                     | 48.59                             |
| 1.00           | 32.98                                    | 9.89                                     | 9.89                                     | 13.20                                    | 30.32                             |
| 1.50           | 43.46                                    | 12.81                                    | 12.81                                    | 17.84                                    | 23.01                             |
| 2.00           | 48.99                                    | 14.61                                    | 14.61                                    | 19.77                                    | 20.41                             |
| 2.50           | 48.34                                    | 14.91                                    | 14.91                                    | 18.52                                    | 20.69                             |
| 3.00           | 42.21                                    | 13.83                                    | 13.83                                    | 14.54                                    | 23.69                             |
| 3.50           | 33.37                                    | 11.98                                    | 11.98                                    | 9.41                                     | 29.97                             |
| 4.00           | 26.74                                    | 10.49                                    | 10.49                                    | 5.76                                     | 37.39                             |

**Table S.20.** Unit cell volume and lattice parameters of ALPO-18 under the effect of different external isotropic pressures.

| <b>P (GPa)</b> | <b>Vol. (Å<sup>3</sup>)</b> | <b>a (Å)</b> | <b>b (Å)</b> | <b>c (Å)</b> | <b><math>\alpha</math> (deg)</b> | <b><math>\beta</math> (deg)</b> | <b><math>\gamma</math>(deg)</b> |
|----------------|-----------------------------|--------------|--------------|--------------|----------------------------------|---------------------------------|---------------------------------|
| -0.4999        | 3197.7568                   | 13.6000      | 12.7052      | 18.5065      | 90.00                            | 90.01                           | 90.00                           |
| -0.2506        | 3186.8453                   | 13.5887      | 12.6883      | 18.4833      | 90.00                            | 90.01                           | 90.00                           |
| -0.0004        | 3175.9001                   | 13.5788      | 12.6705      | 18.4592      | 90.00                            | 90.01                           | 90.00                           |
| 0.2494         | 3164.8470                   | 13.5707      | 12.6512      | 18.4339      | 90.00                            | 90.01                           | 90.00                           |
| 0.4994         | 3153.4940                   | 13.5651      | 12.6299      | 18.4064      | 90.00                            | 90.00                           | 90.00                           |
| 1.0000         | 3128.3061                   | 13.5564      | 12.5810      | 18.3421      | 90.00                            | 90.04                           | 90.00                           |
| 1.5001         | 3096.3524                   | 13.5809      | 12.4818      | 18.2660      | 90.00                            | 90.00                           | 90.00                           |
| 1.7500         | 3077.6167                   | 13.5963      | 12.4237      | 18.2197      | 90.00                            | 90.00                           | 90.00                           |
| 1.9995         | 3026.2831                   | 13.7075      | 12.2421      | 18.0340      | 90.00                            | 90.05                           | 90.00                           |
| 2.2503         | 2928.7204                   | 13.8127      | 11.9483      | 17.7458      | 90.00                            | 90.00                           | 90.00                           |
| 2.4998         | 2859.8113                   | 13.8460      | 11.7527      | 17.5742      | 90.00                            | 90.01                           | 90.00                           |

**Table S.21.** Calculated volumetric compressibilities ( $k_V = -1/V \cdot (\partial V/\partial P)_P$ ) of ALPO-18 and compressibilities along  $a$ ,  $b$  and  $c$  directions ( $k_m = -1/m \cdot (\partial m/\partial P)_P$ ) for different external isotropic pressures. The computed bulk moduli ( $B$ ) are given in the last column of the table.

| <b>P (GPa)</b> | <b><math>k_V(\text{TPa}^{-1})</math></b> | <b><math>k_a(\text{TPa}^{-1})</math></b> | <b><math>k_b(\text{TPa}^{-1})</math></b> | <b><math>k_c(\text{TPa}^{-1})</math></b> | <b><math>B(\text{GPa})</math></b> |
|----------------|------------------------------------------|------------------------------------------|------------------------------------------|------------------------------------------|-----------------------------------|
| 0.00           | 13.54                                    | 3.40                                     | 5.17                                     | 4.97                                     | 73.85                             |
| 0.25           | 16.72                                    | 1.06                                     | 8.12                                     | 7.54                                     | 59.81                             |
| 0.50           | 16.60                                    | 0.44                                     | 8.54                                     | 7.62                                     | 60.24                             |
| 0.75           | 13.89                                    | 1.32                                     | 7.00                                     | 5.57                                     | 72.02                             |
| 1.00           | 12.18                                    | 1.75                                     | 6.55                                     | 3.89                                     | 82.08                             |
| 1.25           | 16.10                                    | -0.72                                    | 11.01                                    | 5.81                                     | 62.12                             |
| 1.50           | 29.35                                    | -7.74                                    | 23.30                                    | 13.79                                    | 34.08                             |
| 1.75           | 53.02                                    | -18.93                                   | 43.81                                    | 28.14                                    | 18.86                             |
| 2.00           | 83.69                                    | -30.57                                   | 68.68                                    | 45.58                                    | 11.95                             |
| 2.25           | 123.92                                   | -21.02                                   | 87.51                                    | 57.43                                    | 8.07                              |
| 2.38           | 136.65                                   | -8.72                                    | 88.85                                    | 56.52                                    | 7.32                              |
| 2.50           | 125.66                                   | -1.88                                    | 80.16                                    | 47.37                                    | 7.96                              |

**Table S.22.** Unit cell volume and lattice parameters of ALPO-18 under the effect of different external pressures applied along the direction of minimum compressibility.

| <b>P (GPa)</b> | <b>Vol. (Å<sup>3</sup>)</b> | <b><i>a</i> (Å)</b> | <b><i>b</i> (Å)</b> | <b><i>c</i> (Å)</b> | <b><i>α</i> (deg)</b> | <b><i>β</i> (deg)</b> | <b><i>γ</i>(deg)</b> |
|----------------|-----------------------------|---------------------|---------------------|---------------------|-----------------------|-----------------------|----------------------|
| -1.4998        | 3164.2264                   | 14.5821             | 12.0236             | 18.0475             | 90.00                 | 89.79                 | 90.00                |
| -1.0000        | 3172.3018                   | 14.3027             | 12.2131             | 18.1606             | 90.00                 | 89.82                 | 90.00                |
| -0.6667        | 3177.7231                   | 14.0973             | 12.3486             | 18.2543             | 90.00                 | 89.84                 | 90.00                |
| -0.3330        | 3179.9498                   | 13.8608             | 12.4987             | 18.3556             | 90.00                 | 89.92                 | 90.00                |
| -0.2496        | 3180.0308                   | 13.7913             | 12.5458             | 18.3793             | 90.00                 | 89.95                 | 90.00                |
| -0.0005        | 3175.9121                   | 13.5787             | 12.6706             | 18.4592             | 90.00                 | 90.01                 | 90.00                |
| 0.3334         | 3154.1855                   | 13.2061             | 12.8474             | 18.5907             | 90.00                 | 90.13                 | 90.00                |
| 0.6670         | 3073.9803                   | 12.5903             | 13.0452             | 18.7162             | 90.00                 | 90.23                 | 90.00                |
| 0.9999         | 2950.4856                   | 11.8747             | 13.2099             | 18.8093             | 90.00                 | 90.21                 | 90.00                |



**Table S.23.** Calculated volumetric compressibilities ( $k_V = -1/V \cdot (\partial V/\partial P)_P$ ) of ALPO-18 for different external anisotropic pressures applied along the direction of minimum compressibility.

| <b>P (GPa)</b> | <b><math>k_V(\text{TPa}^{-1})</math></b> |
|----------------|------------------------------------------|
| -1.00          | -5.27                                    |
| -0.75          | -6.03                                    |
| -0.50          | -4.39                                    |
| -0.25          | 1.52                                     |
| 0.00           | 13.59                                    |
| 0.25           | 33.87                                    |
| 0.50           | 64.80                                    |
| 0.63           | 85.23                                    |
| 0.75           | 109.63                                   |

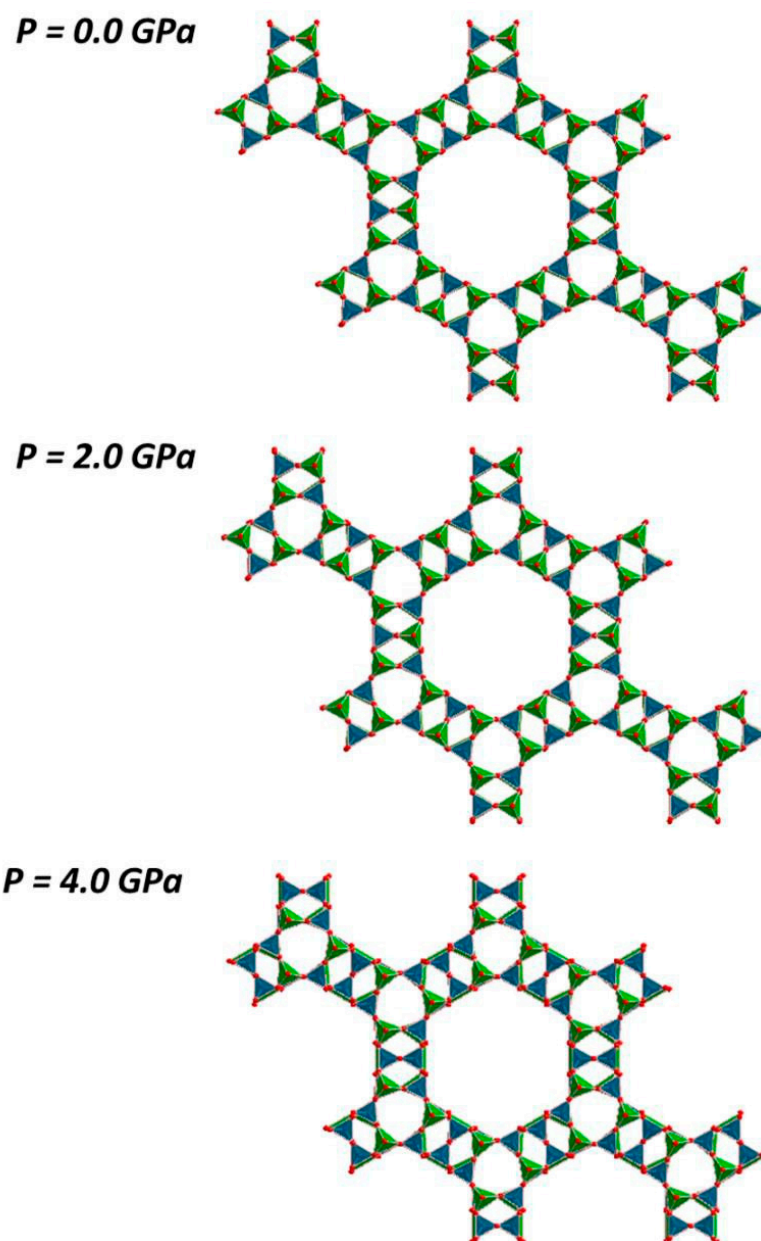

**Figure S.1.** View of a  $2 \times 2 \times 2$  supercell of VPI-5 from [001] under the effect of three different isotropic pressures (0.0, 2.0 and 4.0 GPa).

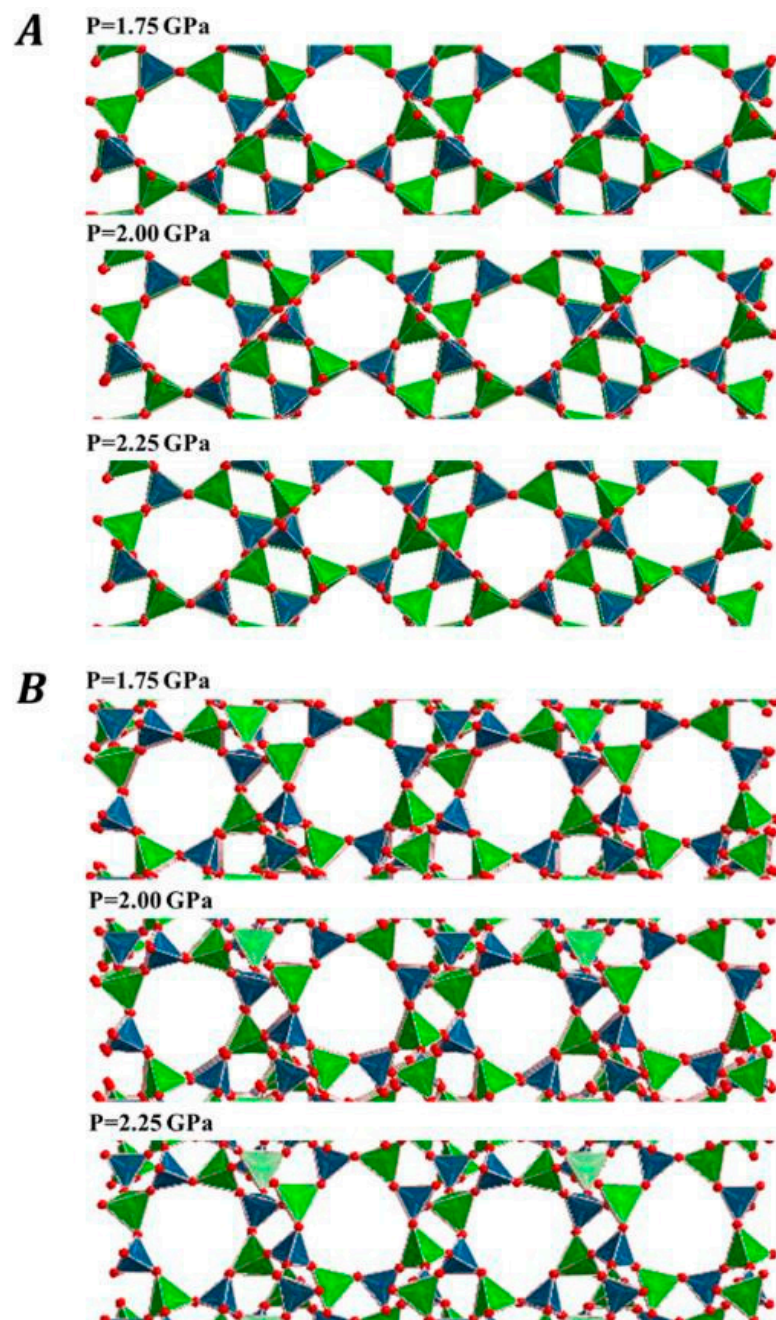

**Figure S.2.** The 8-MR structural channels expanding along (A)  $[1\ 0\ 0]$  and (B)  $[1\ 1\ 0]$  directions in the crystal structure of ALPO-18 under the effect of three different isotropic pressures,  $P = 1.75$ ,  $2.0$  and  $2.25$  GPa.

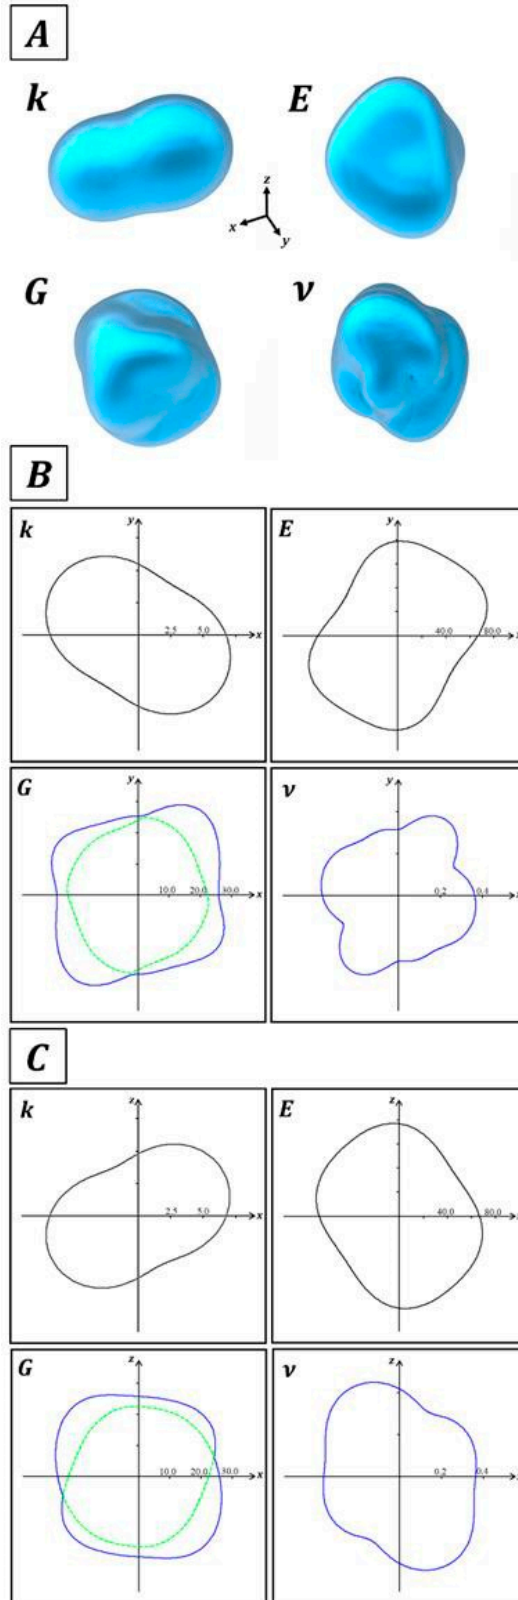

**Figure S.3.** (A) Mechanical properties of ALPO-18W (P1) as a function of the orientation of the applied strain:  $k$  – compressibility,  $E$  – Young modulus,  $G$  – Maximum shear modulus,  $\nu$  – Maximum Poisson's ratio; (B) Bidimensional projections on the  $xy$  plane; (C) Bidimensional projections on the  $xz$  plane. The projections of the surface of minimum shear modulus are also displayed using green color in panels (B) and (C).

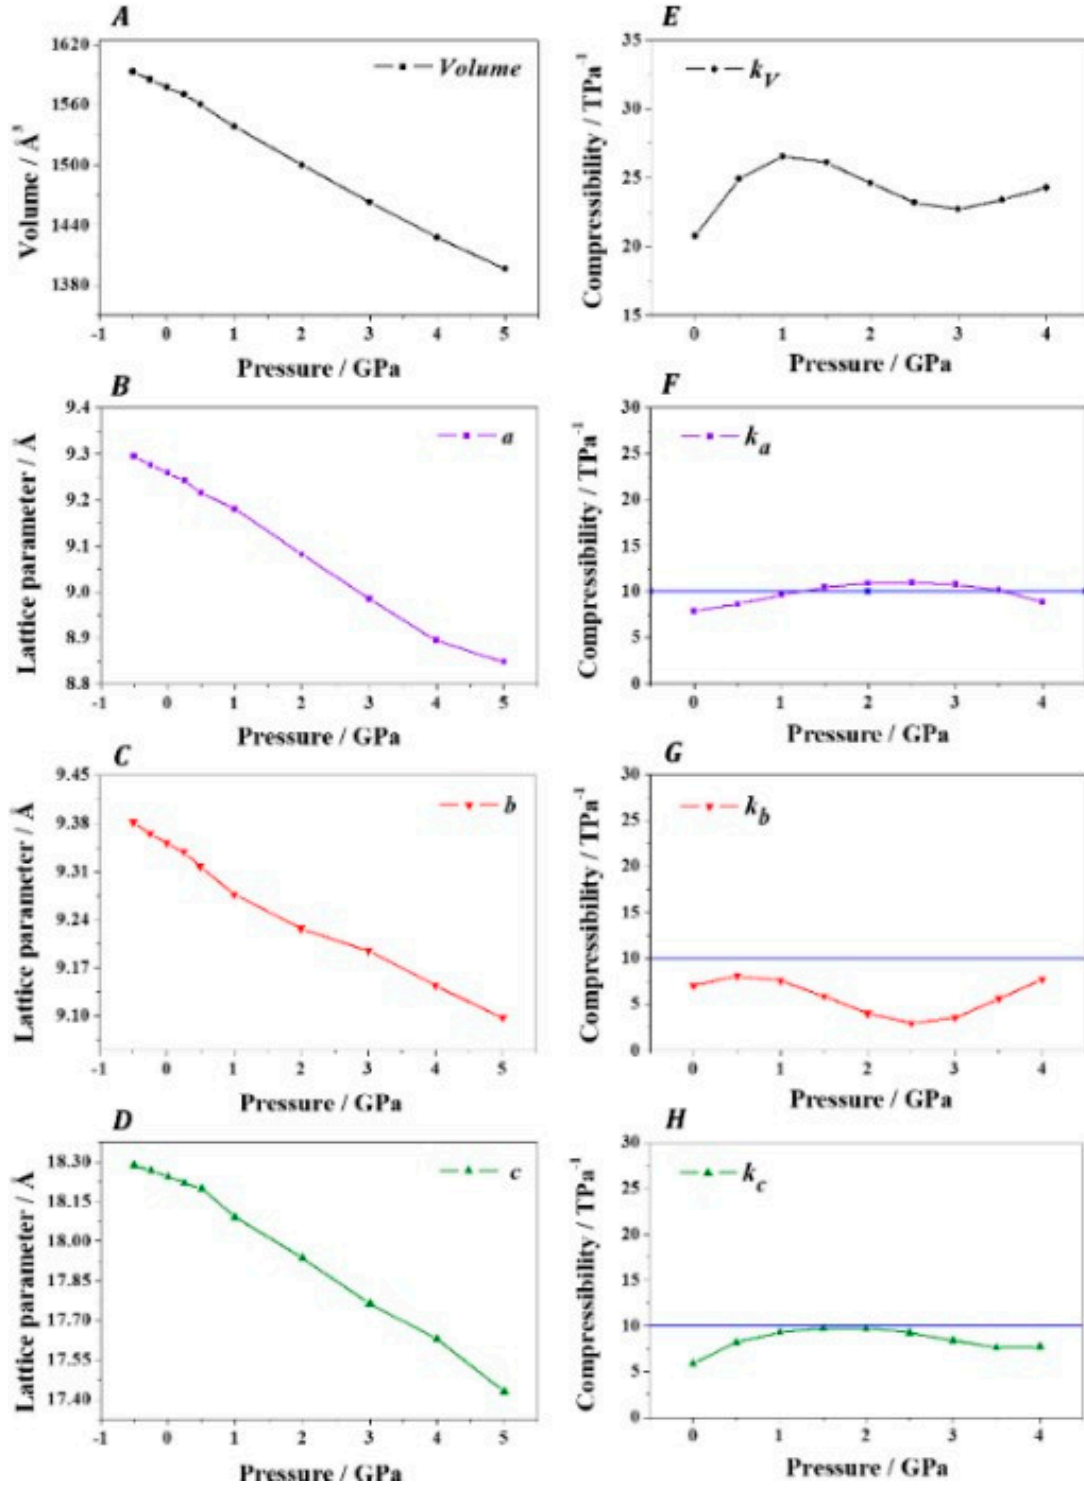

**Figure S.4.** Computed unit cell volume (A) and lattice parameters (B-D) of ALPO-18W under different external isotropic pressures. The volumetric compressibilities (E) and the linear compressibilities along *a*, *b* and *c* (F-H) directions are shown in the panels of the right-hand side. The blue horizontal lines in panels (F), (G) and (H) mark  $k_l = 10.0$  TPa<sup>-1</sup>.

**Table S.24.** Unit cell volume and lattice parameters of ALPO-18W under the effect of different external isotropic pressures.

| <b>P (GPa)</b> | <b>Vol. (Å<sup>3</sup>)</b> | <b>a (Å)</b> | <b>b (Å)</b> | <b>c (Å)</b> | <b><math>\alpha</math> (deg)</b> | <b><math>\beta</math> (deg)</b> | <b><math>\gamma</math> (deg)</b> |
|----------------|-----------------------------|--------------|--------------|--------------|----------------------------------|---------------------------------|----------------------------------|
| -0.5004        | 1593.0622                   | 9.2950       | 9.3818       | 18.2868      | 88.06                            | 91.60                           | 89.46                            |
| -0.2500        | 1585.2300                   | 9.2762       | 9.3654       | 18.2676      | 88.03                            | 91.73                           | 89.39                            |
| -0.0002        | 1577.6793                   | 9.2582       | 9.3513       | 18.2448      | 87.99                            | 91.81                           | 89.32                            |
| 0.2501         | 1570.6914                   | 9.2421       | 9.3387       | 18.2212      | 87.98                            | 91.87                           | 89.27                            |
| 0.4998         | 1560.3447                   | 9.2149       | 9.3174       | 18.1991      | 88.53                            | 91.91                           | 88.19                            |
| 1.0004         | 1538.2880                   | 9.1809       | 9.2769       | 18.0900      | 88.43                            | 91.88                           | 87.95                            |
| 2.0001         | 1499.8588                   | 9.0819       | 9.2269       | 17.9365      | 88.63                            | 92.08                           | 87.28                            |
| 3.0006         | 1462.8963                   | 8.9848       | 9.1950       | 17.7636      | 88.83                            | 93.17                           | 87.00                            |
| 4.0001         | 1427.7488                   | 8.8944       | 9.1446       | 17.6296      | 88.70                            | 93.88                           | 86.71                            |
| 4.9996         | 1396.4871                   | 8.8484       | 9.0974       | 17.4285      | 88.73                            | 94.51                           | 87.24                            |

**Table S.25.** Calculated volumetric compressibilities ( $k_V = -1/V \cdot (\partial V/\partial P)_P$ ) of ALPO-18W and compressibilities along  $a$ ,  $b$  and  $c$  directions ( $k_m = -1/m \cdot (\partial m/\partial P)_P$ ) for different external isotropic pressures. The computed bulk moduli ( $B$ ) are given in the last column of the table.

| P (GPa) | $k_V(\text{TPa}^{-1})$ | $k_a(\text{TPa}^{-1})$ | $k_b(\text{TPa}^{-1})$ | $k_c(\text{TPa}^{-1})$ | $B(\text{GPa})$ |
|---------|------------------------|------------------------|------------------------|------------------------|-----------------|
| 0.00    | 17.01                  | 6.51                   | 5.05                   | 5.27                   | 58.80           |
| 0.13    | 18.64                  | 9.02                   | 5.98                   | 5.98                   | 53.66           |
| 0.25    | 23.01                  | 8.46                   | 7.60                   | 7.60                   | 43.46           |
| 0.38    | 26.06                  | 8.20                   | 8.65                   | 8.65                   | 38.37           |
| 0.50    | 27.90                  | 8.18                   | 9.18                   | 9.18                   | 35.84           |
| 0.63    | 28.80                  | 8.35                   | 9.29                   | 9.29                   | 34.72           |
| 0.75    | 29.00                  | 8.64                   | 9.07                   | 9.07                   | 34.49           |
| 0.88    | 28.70                  | 9.01                   | 8.63                   | 8.63                   | 34.84           |
| 1.00    | 28.08                  | 9.40                   | 8.03                   | 8.03                   | 35.61           |
| 1.50    | 24.90                  | 10.76                  | 5.19                   | 5.19                   | 40.16           |
| 2.00    | 23.74                  | 11.19                  | 3.35                   | 3.35                   | 42.13           |
| 2.50    | 24.95                  | 10.84                  | 3.27                   | 3.27                   | 40.08           |
| 3.00    | 26.17                  | 10.36                  | 4.41                   | 4.41                   | 38.21           |
| 3.50    | 24.80                  | 10.14                  | 5.65                   | 5.65                   | 40.32           |
| 4.00    | 20.76                  | 9.61                   | 5.98                   | 5.98                   | 48.16           |

**Table S.26.** Unit-cell parameters of the VPI-5 (*C1m1*) and ALPO-5 (*Pcc2*).

| Parameter                   | $\alpha$ (Å) | $b$ (Å)    | $c$ (Å)   | $\alpha$ (deg) | $\beta$ (deg) | $\gamma$ (deg) | Vol. (Å <sup>3</sup> ) | $\rho$ (g/cm <sup>3</sup> ) |
|-----------------------------|--------------|------------|-----------|----------------|---------------|----------------|------------------------|-----------------------------|
| <b>VPI-5 (<i>C1m1</i>)</b>  |              |            |           |                |               |                |                        |                             |
| PBE                         | 18.5639      | 32.1132    | 8.5042    | 90.0           | 90.00         | 90.0           | 5069.7613              | 1.438                       |
| PBE+Disp                    | 18.5014      | 32.0028    | 8.4502    | 90.0           | 90.05         | 90.0           | 5003.3578              | 1.457                       |
| PBEsol                      | 18.5331      | 32.0688    | 8.4940    | 90.0           | 89.99         | 90.0           | 5048.3145              | 1.444                       |
| Exp. [2]                    | 18.5218(1)   | 32.1247(2) | 8.4003(2) | 90.0           | 90.00         | 90.0           | 4998.2396              | 1.459                       |
| <b>ALPO-5 (<i>Pcc2</i>)</b> |              |            |           |                |               |                |                        |                             |
| PBE                         | 13.8543      | 24.0375    | 8.5339    | 90.0           | 90.0          | 90.0           | 2841.9699              | 1.710                       |
| PBE+Disp                    | 13.8322      | 23.9860    | 8.5218    | 90.0           | 90.0          | 90.0           | 2827.3454              | 1.719                       |
| PBEsol                      | 13.8602      | 24.0215    | 8.5382    | 90.0           | 90.0          | 90.0           | 2842.7340              | 1.710                       |
| Exp. [4]                    | 13.794(3)    | 23.900(6)  | 8.4168(6) | 90.0           | 90.0          | 90.0           | 2774.8220              | 1.752                       |



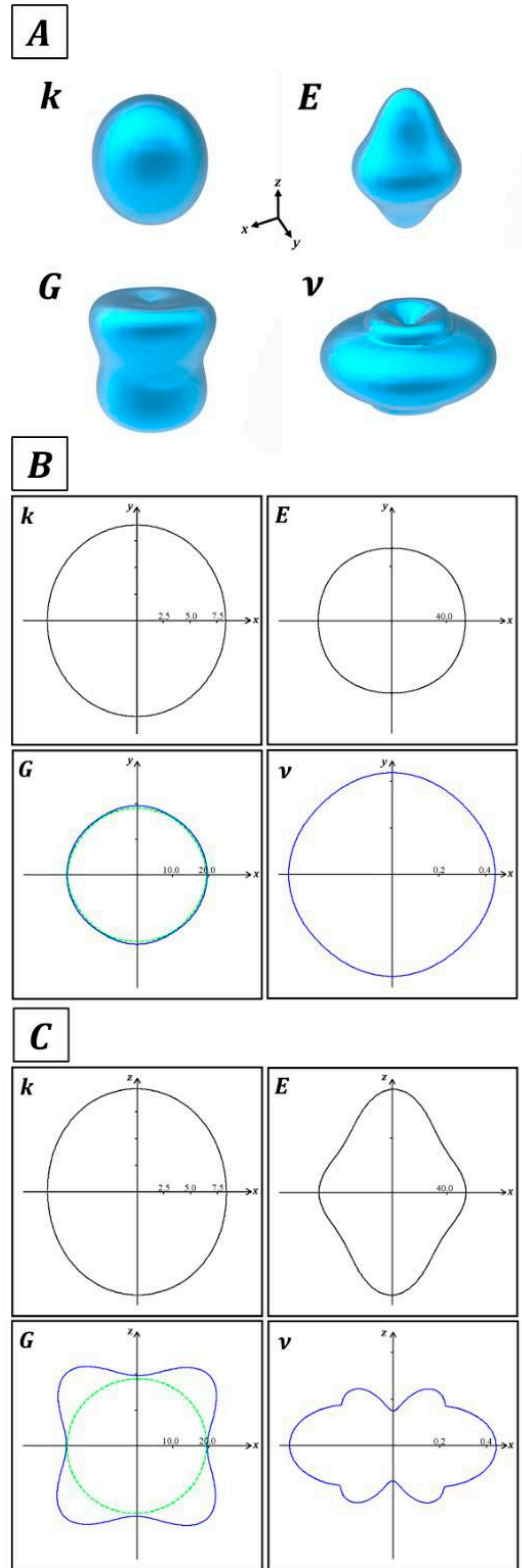

**Figure S.5.** (A) Mechanical properties of VPI-5 ( $C1m1$ ) as a function of the orientation of the applied strain:  $k$  – compressibility,  $E$  – Young modulus,  $G$  – Maximum shear modulus,  $\nu$  – Maximum Poisson's ratio; (B) Bidimensional projections on the  $xy$  plane; (C) Bidimensional projections on the  $xz$  plane. The projections of the surface of minimum shear modulus are also displayed using green color in panels (B) and (C).

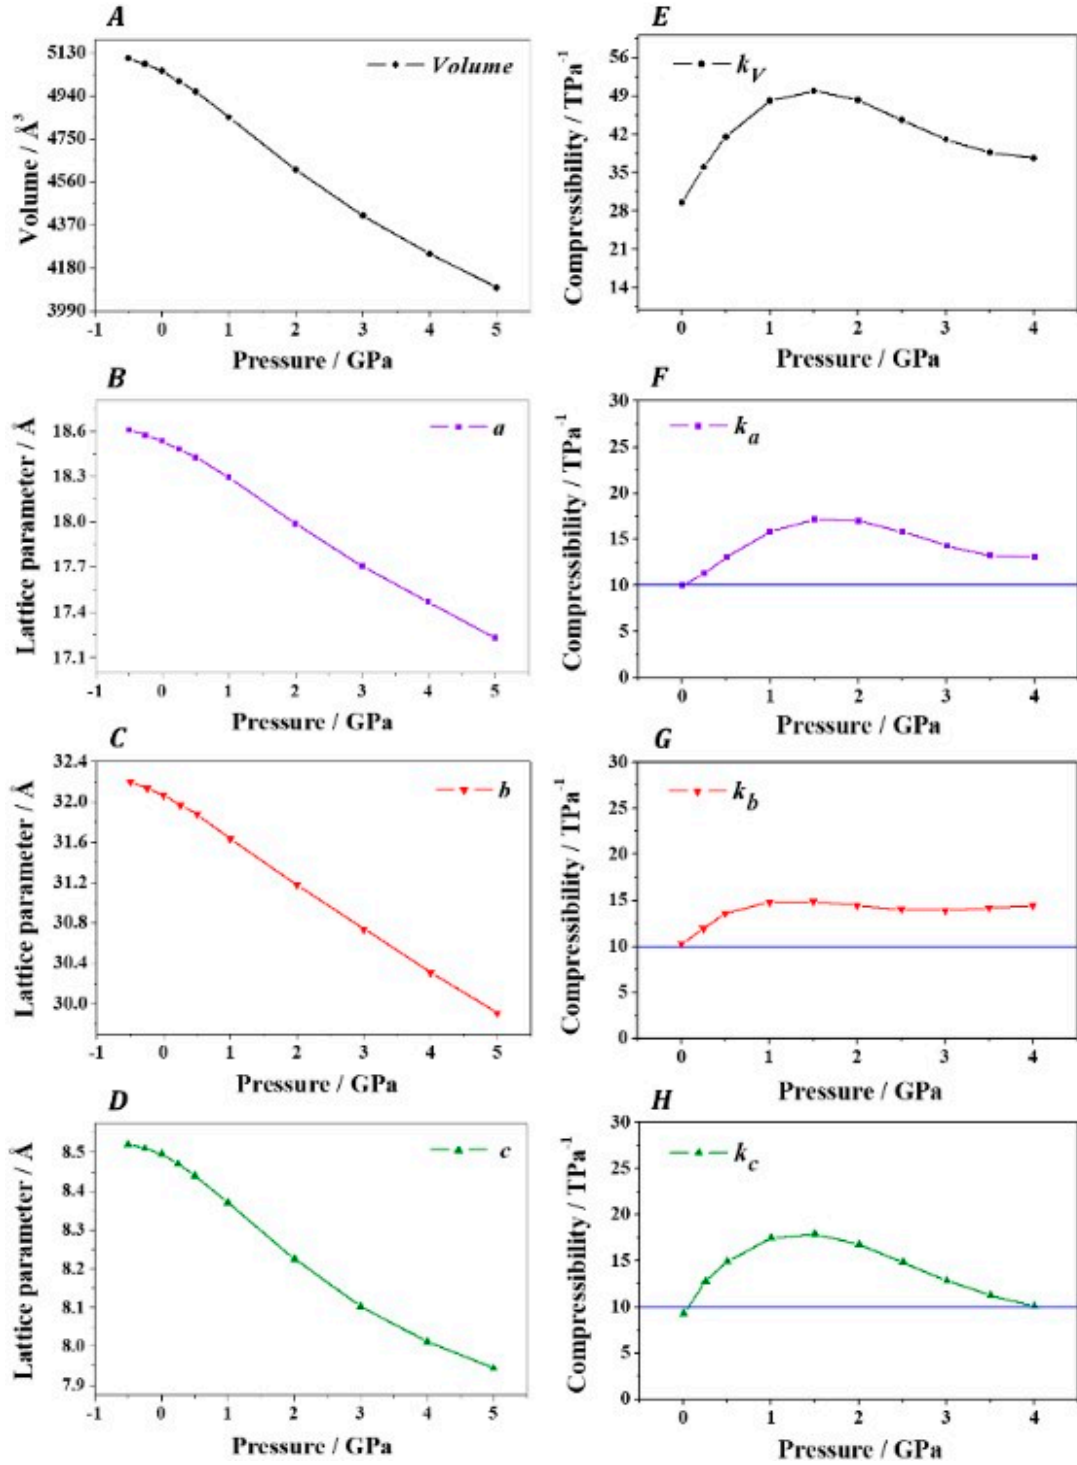

**Figure S.6.** Computed unit cell volume (A) and lattice parameters (B-D) of VPI-5 (C1m1) under different external isotropic pressures. The volumetric compressibilities (E) and the linear compressibilities along  $a$ ,  $b$  and  $c$  (F-H) directions are shown in the panels of the right-hand side. The blue horizontal lines in panels (F), (G) and (H) mark  $k_l = 10.0 \text{ TPa}^{-1}$ .

**Table S.27.** Unit cell volume and lattice parameters of VPI-5 (*C1m1*) under the effect of different external isotropic pressures.

| <b>P (GPa)</b> | <b>Vol. (Å<sup>3</sup>)</b> | <b><i>a</i> (Å)</b> | <b><i>b</i> (Å)</b> | <b><i>c</i> (Å)</b> | <b><i>α</i> (deg)</b> | <b><i>β</i> (deg)</b> | <b><i>γ</i>(deg)</b> |
|----------------|-----------------------------|---------------------|---------------------|---------------------|-----------------------|-----------------------|----------------------|
| -0.5021        | 5105.1785                   | 18.6052             | 32.2013             | 8.5213              | 90.00                 | 90.01                 | 90.00                |
| -0.2499        | 5078.5879                   | 18.5714             | 32.1359             | 8.5096              | 90.00                 | 90.01                 | 90.00                |
| -0.0008        | 5048.3145                   | 18.5331             | 32.0688             | 8.4940              | 90.00                 | 89.99                 | 90.00                |
| 0.2501         | 5003.1629                   | 18.4778             | 31.9683             | 8.4698              | 90.00                 | 90.00                 | 90.00                |
| 0.5021         | 4957.4319                   | 18.4265             | 31.8752             | 8.4404              | 90.00                 | 90.01                 | 90.00                |
| 0.9999         | 4843.9728                   | 18.2937             | 31.6347             | 8.3702              | 90.00                 | 90.00                 | 90.00                |
| 1.9999         | 4612.1601                   | 17.9848             | 31.1786             | 8.2251              | 90.00                 | 90.00                 | 90.00                |
| 3.0014         | 4409.8252                   | 17.7043             | 30.7389             | 8.1031              | 90.00                 | 89.99                 | 90.00                |
| 4.0000         | 4242.0565                   | 17.4684             | 30.3086             | 8.0123              | 90.00                 | 89.98                 | 90.00                |
| 4.9997         | 4093.2800                   | 17.2294             | 29.9064             | 7.9440              | 90.00                 | 89.96                 | 90.00                |

**Table S.28.** Calculated volumetric compressibilities ( $k_V = -1/V \cdot (\partial V/\partial P)_P$ ) of VPI-5 (*C1m1*) and compressibilities along *a*, *b* and *c* directions ( $k_m = -1/m \cdot (\partial m/\partial P)_P$ ) for different external isotropic pressures. The computed bulk moduli (*B*) are given in the last column of the table.

| <b>P (GPa)</b> | <b><math>k_V(\text{TPa}^{-1})</math></b> | <b><math>k_a(\text{TPa}^{-1})</math></b> | <b><math>k_b(\text{TPa}^{-1})</math></b> | <b><math>k_c(\text{TPa}^{-1})</math></b> | <b><i>B</i>(GPa)</b> |
|----------------|------------------------------------------|------------------------------------------|------------------------------------------|------------------------------------------|----------------------|
| 0.00           | 29.54                                    | 10.01                                    | 10.28                                    | 9.26                                     | 33.85                |
| 0.25           | 36.00                                    | 11.28                                    | 11.94                                    | 12.78                                    | 27.78                |
| 0.50           | 41.56                                    | 13.05                                    | 13.59                                    | 14.92                                    | 24.06                |
| 1.00           | 48.12                                    | 15.84                                    | 14.79                                    | 17.49                                    | 20.78                |
| 1.50           | 49.95                                    | 17.17                                    | 14.88                                    | 17.91                                    | 20.02                |
| 2.00           | 48.22                                    | 17.00                                    | 14.44                                    | 16.78                                    | 20.74                |
| 2.50           | 44.66                                    | 15.81                                    | 14.00                                    | 14.84                                    | 22.39                |
| 3.00           | 41.05                                    | 14.31                                    | 13.90                                    | 12.84                                    | 24.36                |
| 3.50           | 38.67                                    | 13.25                                    | 14.16                                    | 11.25                                    | 25.86                |
| 4.00           | 37.64                                    | 13.10                                    | 14.42                                    | 10.12                                    | 26.57                |

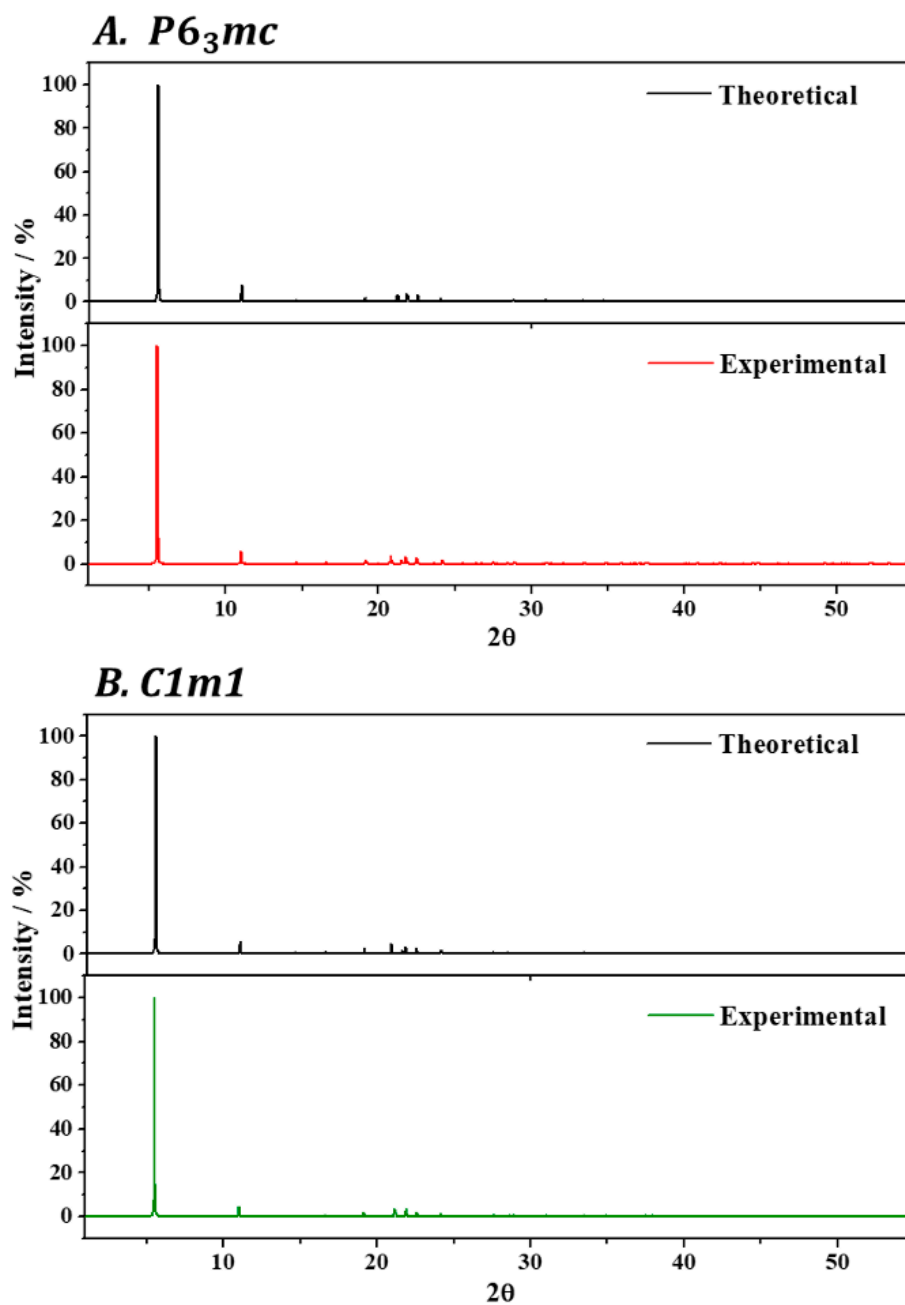

**Figure S.7.** Comparison of the X-ray diffraction patterns of VPI-5 derived from the computed and experimental [1-2] crystal structures: (A)  $P6_3mc$  structure; (B)  $C1m1$  structure.

**Table S.29.** Most intense reflections in the X-ray diffraction pattern of VPI-5 (*C1m1*): (a) X-ray pattern derived from the experimental crystal structure [2]; (b) X-ray pattern derived from the calculated crystal structure.

| $[h\ k\ l]$ | (a) Exp [2].            |                   |           | (b) Calc.               |                   | $\Delta\ (2\theta)$ |
|-------------|-------------------------|-------------------|-----------|-------------------------|-------------------|---------------------|
|             | $2\theta\ (\text{deg})$ | $d\ (\text{\AA})$ | $I\ (\%)$ | $2\theta\ (\text{deg})$ | $d\ (\text{\AA})$ |                     |
| [1 1 0]     | 5.503                   | 16.046            | 100.000   | 5.503                   | 16.047            | 0.00                |
| [0 2 0]     | 5.498                   | 16.062            | 53.499    | 5.507                   | 16.035            | 0.01                |
| [0 0 2]     | 21.135                  | 4.200             | 8.947     | 20.900                  | 4.247             | -0.24               |
| [2 2 0]     | 11.019                  | 8.023             | 8.691     | 11.019                  | 8.023             | 0.00                |
| [0 4 0]     | 11.008                  | 8.031             | 4.170     | 11.027                  | 8.018             | 0.02                |
| [2 6 0]     | 19.132                  | 4.635             | 3.389     | 19.154                  | 4.630             | 0.02                |
| [-2 6 1]    | 21.883                  | 4.058             | 2.030     | 21.846                  | 4.065             | -0.04               |
| [2 6 1]     | 21.883                  | 4.058             | 1.919     | 21.844                  | 4.065             | -0.04               |
| [4 0 0]     | 19.152                  | 4.630             | 1.592     | 19.140                  | 4.633             | -0.01               |
| [2 8 0]     | 24.137                  | 3.684             | 1.501     | 24.170                  | 3.679             | 0.03                |
| [-1 1 2]    | 21.856                  | 4.063             | 1.462     | 21.628                  | 4.106             | -0.23               |
| [0 2 2]     | 21.855                  | 4.064             | 1.406     | 21.629                  | 4.105             | -0.23               |
| [1 1 2]     | 21.856                  | 4.063             | 1.392     | 21.627                  | 4.106             | -0.23               |
| [3 7 0]     | 24.144                  | 3.683             | 1.362     | 24.165                  | 3.680             | 0.02                |
| [3 9 0]     | 28.869                  | 3.090             | 1.342     | 28.902                  | 3.087             | 0.03                |
| [5 1 0]     | 24.165                  | 3.680             | 1.298     | 24.151                  | 3.682             | -0.01               |
| [4 0 1]     | 21.900                  | 4.055             | 1.090     | 21.832                  | 4.068             | -0.07               |

**Table S.30.** Comparison of the most intense reflections in the X-ray diffraction patterns of VPI-5 derived from the experimental  $C1m1$  crystal structures reported by Fabbiani *et al.* [9] and De Oñate Martínez *et al.* [2].

| $[h\ k\ l]$ | (a) Exp. [9]            |                   |           | (b) Exp [2].            |                   | $\Delta\ (2\theta)$ |
|-------------|-------------------------|-------------------|-----------|-------------------------|-------------------|---------------------|
|             | $2\theta\ (\text{deg})$ | $d\ (\text{\AA})$ | $I\ (\%)$ | $2\theta\ (\text{deg})$ | $d\ (\text{\AA})$ |                     |
| [1 1 0]     | 5.518                   | 16.002            | 100.000   | 5.503                   | 16.046            | -0.01               |
| [0 2 0]     | 5.514                   | 16.016            | 50.649    | 5.498                   | 16.062            | -0.02               |
| [0 0 4]     | 21.204                  | 4.187             | 8.546     | 21.135                  | 4.200             | -0.07               |
| [2 2 0]     | 11.049                  | 8.001             | 8.528     | 11.019                  | 8.023             | -0.03               |
| [0 4 0]     | 11.040                  | 8.008             | 4.360     | 11.008                  | 8.031             | -0.03               |
| [2 6 0]     | 19.187                  | 4.622             | 3.336     | 19.132                  | 4.635             | -0.05               |
| [-2 6 2]    | 21.945                  | 4.047             | 2.081     | 21.883                  | 4.058             | -0.06               |
| [2 6 2]     | 21.950                  | 4.046             | 2.013     | 21.883                  | 4.058             | -0.07               |
| [4 0 0]     | 19.203                  | 4.618             | 1.733     | 19.152                  | 4.630             | -0.05               |
| [2 8 0]     | 24.208                  | 3.674             | 1.388     | 24.137                  | 3.684             | -0.07               |
| [0 2 4]     | 21.925                  | 4.051             | 1.376     | 21.856                  | 4.063             | -0.07               |
| [-1 1 4]    | 21.924                  | 4.051             | 1.367     | 21.855                  | 4.064             | -0.07               |
| [1 1 4]     | 21.929                  | 4.050             | 1.362     | 21.855                  | 4.064             | -0.07               |
| [5 1 0]     | 24.23                   | 3.670             | 1.354     | 24.165                  | 3.680             | -0.07               |
| [3 7 0]     | 24.213                  | 3.673             | 1.350     | 24.144                  | 3.683             | -0.07               |
| [3 9 0]     | 28.954                  | 3.081             | 1.166     | 28.869                  | 3.090             | -0.09               |

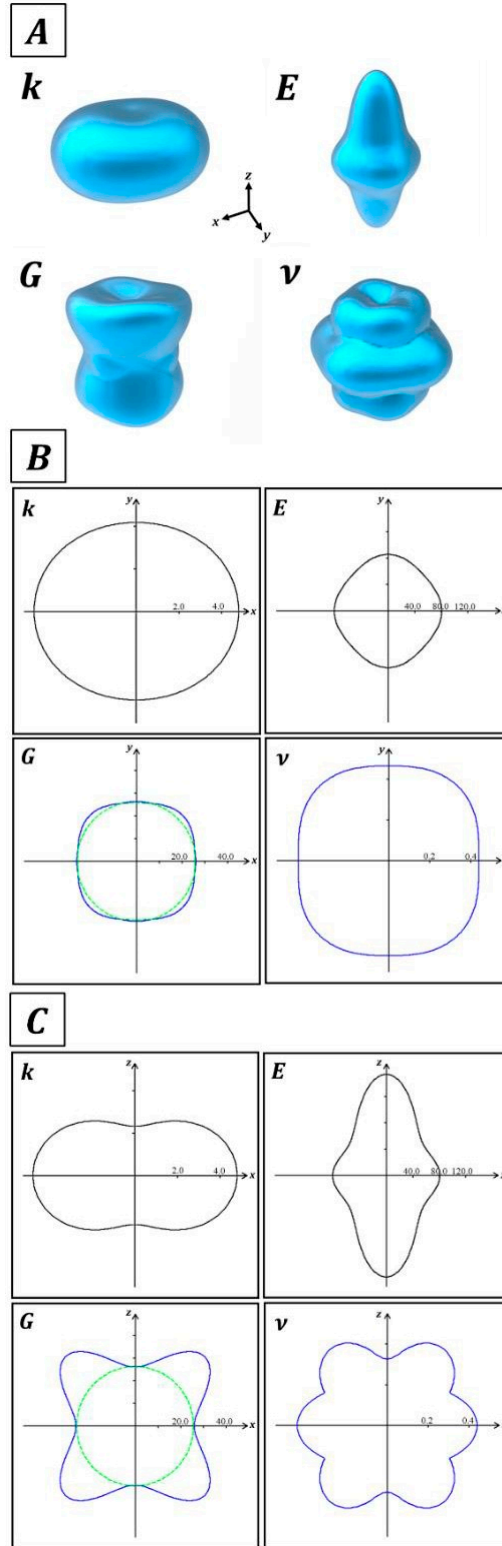

**Figure S.8.** (A) Mechanical properties of ALPO-5 ( $Pcc2$ ) as a function of the orientation of the applied strain:  $k$  – compressibility,  $E$  – Young modulus,  $G$  – Maximum shear modulus,  $\nu$  – Maximum Poisson's ratio; (B) Bidimensional projections on the  $xy$  plane; (C) Bidimensional projections on the  $xz$  plane. The projections of the surface of minimum shear modulus are also displayed using green color in panels (B) and (C).



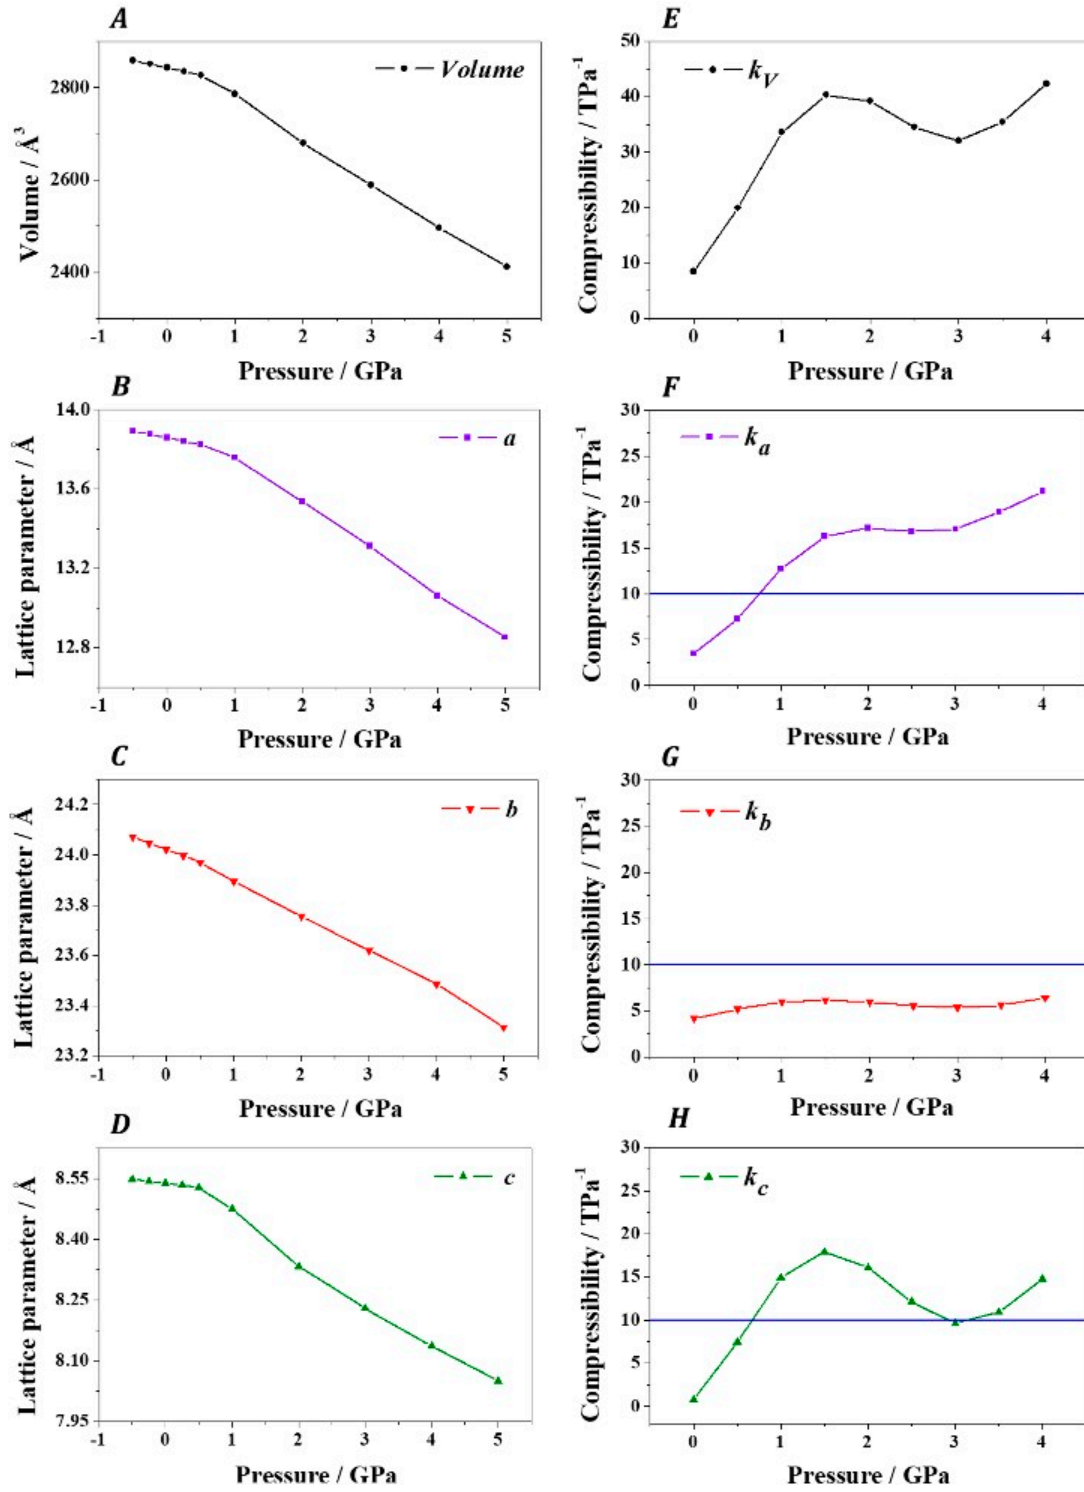

**Figure S.9.** Computed unit cell volume (A) and lattice parameters (B-D) of ALPO-5 (Pcc2) under different external isotropic pressures. The volumetric compressibilities (E) and the linear compressibilities along  $a$ ,  $b$  and  $c$  (F-H) directions are shown in the panels of the right-hand side. The blue horizontal lines in panels (F), (G) and (H) mark  $k_l = 10.0 \text{ TPa}^{-1}$ .

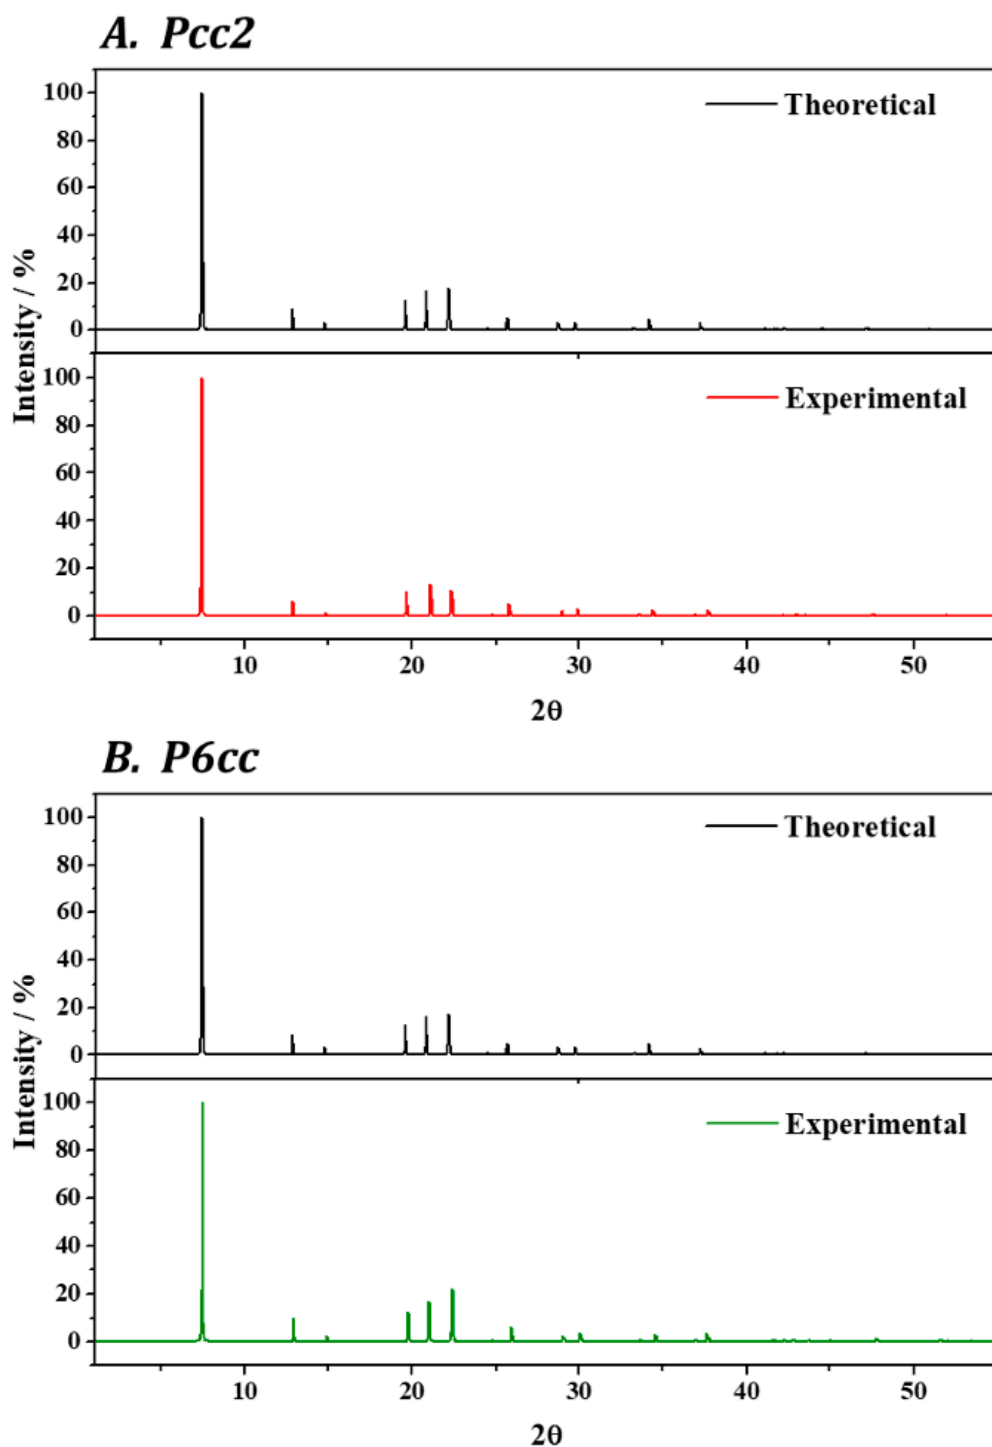

**Figure S.10.** Comparison of the X-ray diffraction patterns of ALPO-5 derived from the computed and experimental [4-5] crystal structures: (A) *Pcc2* structure; (B) *P6cc* structure.

**Table S.31.** Most intense reflections in the X-ray diffraction pattern of ALPO-5 (*Pcc2*): (a) X-ray pattern derived from the experimental crystal structure [4]; (b) X-ray pattern derived from the calculated crystal structure.

| $[h\ k\ l]$ | (a) Exp [4].            |                   |           | (b) Calc.               |                   | $\Delta\ (2\theta)$ |
|-------------|-------------------------|-------------------|-----------|-------------------------|-------------------|---------------------|
|             | $2\theta\ (\text{deg})$ | $d\ (\text{\AA})$ | $I\ (\%)$ | $2\theta\ (\text{deg})$ | $d\ (\text{\AA})$ |                     |
| [1 1 0]     | 7.394                   | 11.947            | 100.000   | 7.358                   | 12.005            | -0.04               |
| [0 2 0]     | 7.392                   | 11.950            | 52.108    | 7.354                   | 12.011            | -0.04               |
| [0 0 2]     | 21.094                  | 4.208             | 28.725    | 20.790                  | 4.269             | -0.30               |
| [2 4 1]     | 22.323                  | 3.979             | 13.225    | 22.164                  | 4.008             | -0.16               |
| [1 5 1]     | 22.321                  | 3.980             | 11.418    | 22.161                  | 4.008             | -0.16               |
| [3 1 1]     | 22.326                  | 3.979             | 10.114    | 22.170                  | 4.006             | -0.16               |
| [1 3 0]     | 12.822                  | 6.899             | 8.580     | 12.758                  | 6.933             | -0.06               |
| [3 1 0]     | 19.646                  | 4.515             | 8.281     | 19.551                  | 4.537             | -0.10               |
| [1 5 0]     | 19.640                  | 4.517             | 7.921     | 19.540                  | 4.539             | -0.10               |
| [2 6 0]     | 25.808                  | 3.449             | 7.271     | 25.677                  | 3.467             | -0.13               |
| [4 0 0]     | 25.814                  | 3.449             | 5.855     | 25.689                  | 3.465             | -0.13               |
| [2 4 0]     | 19.642                  | 4.516             | 5.640     | 19.544                  | 4.538             | -0.10               |
| [2 0 0]     | 12.825                  | 6.897             | 5.608     | 12.764                  | 6.930             | -0.06               |
| [1 1 2]     | 22.380                  | 3.969             | 4.897     | 22.081                  | 4.022             | -0.30               |
| [4 4 0]     | 29.892                  | 2.987             | 4.341     | 29.743                  | 3.001             | -0.15               |
| [2 2 0]     | 14.818                  | 5.974             | 3.555     | 14.746                  | 6.003             | -0.07               |
| [0 8 0]     | 29.884                  | 2.988             | 3.502     | 29.729                  | 3.003             | -0.16               |
| [5 3 0]     | 34.373                  | 2.607             | 3.194     | 34.203                  | 2.620             | -0.17               |
| [3 1 3]     | 37.718                  | 2.383             | 3.116     | 37.265                  | 2.411             | -0.45               |
| [1 5 3]     | 37.715                  | 2.383             | 2.997     | 37.260                  | 2.411             | -0.46               |
| [1 9 0]     | 34.363                  | 2.608             | 2.906     | 34.184                  | 2.621             | -0.18               |
| [0 2 2]     | 22.379                  | 3.969             | 2.574     | 22.080                  | 4.023             | -0.30               |
| [0 0 4]     | 42.948                  | 2.104             | 2.026     | 42.307                  | 2.135             | -0.64               |

**Table S.32.** Unit cell volume and lattice parameters of ALPO-5 (*Pcc2*) under the effect different external isotropic pressures.

| <b>P (GPa)</b> | <b>Vol. (Å<sup>3</sup>)</b> | <b><i>a</i> (Å)</b> | <b><i>b</i> (Å)</b> | <b><i>c</i> (Å)</b> | <b><i>α</i> (deg)</b> | <b><i>β</i> (deg)</b> | <b><i>γ</i>(deg)</b> |
|----------------|-----------------------------|---------------------|---------------------|---------------------|-----------------------|-----------------------|----------------------|
| -0.4996        | 2858.8735                   | 13.8941             | 24.0709             | 8.5482              | 90.00                 | 90.00                 | 90.00                |
| -0.2500        | 2850.8291                   | 13.8775             | 24.0457             | 8.5432              | 90.00                 | 90.00                 | 90.00                |
| 0.0003         | 2842.7300                   | 13.8602             | 24.0214             | 8.5382              | 90.00                 | 90.00                 | 90.00                |
| 0.2503         | 2834.6532                   | 13.8420             | 23.9978             | 8.5335              | 90.00                 | 90.00                 | 90.00                |
| 0.5001         | 2825.8905                   | 13.8247             | 23.9706             | 8.5275              | 90.00                 | 90.00                 | 90.00                |
| 0.9999         | 2786.5189                   | 13.7601             | 23.8953             | 8.4748              | 90.00                 | 90.00                 | 90.00                |
| 2.0002         | 2679.7941                   | 13.5384             | 23.7554             | 8.3325              | 90.00                 | 90.00                 | 90.00                |
| 3.0005         | 2588.0800                   | 13.3142             | 23.6197             | 8.2298              | 90.00                 | 90.00                 | 90.00                |
| 3.9996         | 2496.2857                   | 13.0627             | 23.4860             | 8.1368              | 90.00                 | 90.00                 | 90.00                |
| 5.0004         | 2412.1252                   | 12.8524             | 23.3130             | 8.0504              | 90.00                 | 90.00                 | 90.00                |

**Table S.33.** Calculated volumetric compressibilities ( $k_V = -1/V \cdot (\partial V/\partial P)_P$ ) of ALPO-5 (*Pcc2*) and compressibilities along *a*, *b* and *c* directions ( $k_m = -1/m \cdot (\partial m/\partial P)_P$ ) for different external isotropic pressures. The computed bulk moduli (*B*) are given in the last column of the table.

| <b>P (GPa)</b> | <b><math>k_V(\text{TPa}^{-1})</math></b> | <b><math>k_a(\text{TPa}^{-1})</math></b> | <b><math>k_b(\text{TPa}^{-1})</math></b> | <b><math>k_c(\text{TPa}^{-1})</math></b> | <b><i>B</i>(GPa)</b> |
|----------------|------------------------------------------|------------------------------------------|------------------------------------------|------------------------------------------|----------------------|
| 0.00           | 11.40                                    | 5.24                                     | 3.90                                     | 2.26                                     | 87.71                |
| 0.13           | 11.35                                    | 5.29                                     | 3.90                                     | 2.16                                     | 88.07                |
| 0.25           | 11.47                                    | 5.14                                     | 4.10                                     | 2.23                                     | 87.15                |
| 0.38           | 12.19                                    | 4.96                                     | 4.51                                     | 2.72                                     | 82.04                |
| 0.50           | 18.77                                    | 6.22                                     | 5.55                                     | 7.00                                     | 53.28                |
| 0.63           | 24.12                                    | 7.75                                     | 6.13                                     | 10.25                                    | 41.46                |
| 0.75           | 28.62                                    | 9.38                                     | 6.43                                     | 12.81                                    | 34.94                |
| 0.88           | 32.29                                    | 11.02                                    | 6.53                                     | 14.75                                    | 30.97                |
| 1.00           | 35.19                                    | 12.56                                    | 6.48                                     | 16.15                                    | 28.42                |
| 1.50           | 40.21                                    | 16.84                                    | 5.80                                     | 17.57                                    | 24.87                |
| 2.00           | 38.24                                    | 17.61                                    | 5.46                                     | 15.17                                    | 26.15                |
| 2.50           | 34.40                                    | 16.53                                    | 5.73                                     | 12.14                                    | 29.07                |
| 3.00           | 32.98                                    | 16.37                                    | 6.01                                     | 10.59                                    | 30.32                |
| 3.50           | 35.81                                    | 18.87                                    | 5.74                                     | 11.20                                    | 27.92                |
| 4.00           | 40.43                                    | 22.46                                    | 5.18                                     | 12.80                                    | 24.73                |

## References

1. Poojary, D.M.; Perez, J.O.; Clearfield, A. Crystal structures of dehydrated VPI-5 and H1 aluminum phosphates from X-ray powder data. *J. Phys. Chem. C* **2018**, *17*, 7709–7714.
2. De Oñate Martínez, J.; McCusker, L.B.; Baerlocher, C. Characterization and structural analysis of differently prepared samples of dehydrated VPI-5. *Microporous Mesoporous Mater.* **2000**, *34*, 99–113.
3. Dessau, R.M.; Schlenker, J.L.; Higgins, J.B. Framework topology of  $\text{AlPO}_4\text{-8}$ : the first 14-ring molecular sieves. *Zeolites* **1990**, *10*, 522–524.
4. Mora, A.J.; Fitch, A.M.; Cole, M.; Goyal, R.; Jones, R. H.; Jobic, H. C.; Carr, S. W. The structure of the calcined aluminophosphate  $\text{ALPO}_4\text{-5}$  determined by high-resolution X-ray and neutron powder diffraction. *J. Mater. Chem.* **1996**, *6*, 1831–1835.
5. Klap, G.J.; Van Koningsveld, H.; Graafsma, H.; Schreurs, A.M.M. Absolute configuration and domain structure of  $\text{AlPO}_4\text{-5}$  studied by single crystal X-ray diffraction. *Microporous Mesoporous Mater.* **2000**, *38*, 403–412.
6. Simmen, A.; McCusker, L. B.; Baerlocher, C.; Meier, W. M. The structure determination and rietveld refinement of the aluminophosphate  $\text{AlPO}_4\text{-18}$ . *Zeolites*, **1991**, *11*, 654–661.
7. Poulet, G, Tuel, A, Sautet, P.A. A Combined Experimental and Theoretical Evaluation of the Structure of Hydrated Microporous Aluminophosphate  $\text{AlPO}_4\text{-18}$ . *J. Phys. Chem. B* **2005**, *109*, 22939–22946.
8. Bennett, J.M.; Kirchner, R.M. The structure of calcined  $\text{AlPO}_4\text{-31}$ : A new framework topology containing one-dimensional 12-ring pores. *Zeolites* **1992**, *12*, 338–342.
9. Fabbiani, M.; Polisi, B.; Fraisse, B.; Arletti, R.; Santoro, M.; Alabarse, F.; Haines, J. An in-situ x-ray diffraction and infrared spectroscopic study of the dehydration of  $\text{AlPO}_4\text{-54}$ . *Solid State Sci.* **2020**, *108*, 106378.
